1 **Targeting Vitamin-D receptor (VDR) by a small molecule antagonist MeTC7 inhibits PD-L1**  
2 **but controls THMYCN neuroblastoma growth PD-L1 independently.**

3 Rakesh K. Singh<sup>1\*</sup>, KyuKwang Kim<sup>1</sup>, Rachael B. Rowswell-Turner<sup>1</sup>, Jeanne N. Hansen<sup>2</sup>, Negar  
4 Khazan<sup>1</sup>, Aaron Jones<sup>1</sup>, Umayal Sivagnanalingam<sup>1</sup>, Yuki Teramoto<sup>3</sup>, Takuro Goto<sup>3</sup>, Ye Jian<sup>4</sup>,  
5 Nicholas Battaglia<sup>4</sup>, Thomas Conley<sup>1</sup>, Virginia Hovanesian<sup>5</sup>, Naohiro Yano<sup>6</sup>, Ravina Pandita<sup>1</sup>,  
6 Leggy A. Arnold<sup>7</sup>, Russel Hopson<sup>8</sup>, Debasmita Ojha<sup>9</sup>, Ashoke Sharon<sup>9</sup>, John Ashton<sup>10</sup>, Hiroshi  
7 Miyamoto<sup>3</sup>, Nina F. Schor<sup>11</sup>, Michael T. Milano<sup>12</sup>, David C. Linehan<sup>4</sup>, Scott A. Gerber<sup>4,12</sup>, Richard  
8 G. Moore<sup>1</sup>.

9 <sup>1</sup>Wilmot Cancer Institute and Division of Gynecologic Oncology, Department of Obstetrics and  
10 Gynecology, University of Rochester Medical Center, Rochester, NY, USA.

11 <sup>2</sup>Department of Pediatrics, University of Rochester Medical Center, Rochester, NY, USA;  
12 Current address: Department of Biology, Colgate University, Hamilton, NY, USA.

13 <sup>3</sup>Department of Pathology and Laboratory Medicine, University of Rochester Medical Center,  
14 University of Rochester, Rochester, NY, USA

15 <sup>4</sup>Division of Surgery and of Microbiology and Immunology, University of Rochester, Rochester,  
16 NY, USA.

17 <sup>5</sup>Digital Imaging and Analysis Laboratory, Rhode Island Hospital, Providence, RI, USA.

18 <sup>6</sup>Alpert Medical School of Brown University, Department of Surgery, Division of Surgical  
19 Research, Rhode Island Hospital, Providence, RI, USA.

20 <sup>7</sup>Department of Chemistry and Biochemistry, University of Wisconsin Milwaukee, Milwaukee,  
21 WI, USA.

22 <sup>8</sup>Department of Chemistry, Brown University, Providence, RI, USA.

23 <sup>9</sup>Department of Chemistry, Birla Institute of Technology, Mesra, Ranchi, India.

24 <sup>10</sup>Genomics Core facility, Wilmot Cancer Center, University of Rochester Medical Center,  
25 Rochester, NY, USA.

26 <sup>11</sup>Departments of Pediatrics, Neurology, and Neuroscience, University of Rochester Medical  
27 Center, Rochester, NY, USA; Current address: NINDS, National Institute of Health, Bethesda,  
28 MD, USA.

29 <sup>12</sup>Department of Radiation Oncology, University of Rochester Medical Center, Rochester, NY,  
30 USA.

31

32 **Corresponding Author:** Rakesh Singh ([Rakesh\\_Singh@URMC.Rochester.edu](mailto:Rakesh_Singh@URMC.Rochester.edu)). Telephone  
33 (office): 585-276-6281.

34

35 **Abstract:**

36 Vitamin-D receptor (VDR) mRNA is enriched in malignant lung, ovarian and pancreatic tissues  
37 and showed poor prognoses. Calcitriol and stable or CRISPR-directed VDR upregulation  
38 increased PD-L1 mRNA and protein expression in cancer cells in-vitro. A ChIP assay showed  
39 the binding of VDR with VDRE<sup>PD-L1</sup>. Stattic, a STAT3 phosphorylation inhibitor blocked calcitriol  
40 or VDR overexpression induced PD-L1 upregulation. MeTC7, a VDR antagonist developed by  
41 us, reduced PD-L1 expression on macrophages, ovarian, lung, breast, and pancreatic cancer  
42 cells in-vitro. In radiotherapy inducible PD-L1 model of orthotopic MC38 murine colon cancer,  
43 MeTC7 decreased PD-L1 surface expression, suppressed inflammatory monocytes (IMs)  
44 population and increased intra-tumoral CD69+PD1+CD8<sup>+</sup>T-cells. Intriguingly, MeTC7 reduced  
45 TH-MYCN transgenic neuroblastoma tumor growth without affecting PD-L1 and tumor immune  
46 milieu. In summary, Vitamin-D/VDR drives PD-L1 expression on cancer cells via STAT-3.  
47 Inhibiting VDR exhibited anti-checkpoint effects in orthotopic colon tumors, whereas PDL1-  
48 independent and anti-VDR/MYCN effects controlled growth of transgenic neuroblastoma and  
49 xenografted tumors.

50 **Summary:** Vitamin-D/VDR induces PD-L1 expression on cancer cells via STAT-3; and targeting  
51 VDR by a novel small molecule antagonist MeTC7 exhibits both anti-PD-L1 and anti-  
52 VDR/MYCN effects in tumor models.

53

54 **Introduction:**

55 Calcitriol, a VDR agonist, had exhibited anti-proliferative effects in experimental models of  
56 colon, breast, prostate and pancreatic cancer and hematologic malignancies (Giammanco et al.,  
57 2015). Phase-II/III clinical trials evaluating calcitriol showed lack of therapeutic responses and  
58 caused hypercalcemia (Beer et al., 2004, Trump DL et al., 2006). We demonstrate that VDR is  
59 overexpressed in malignant tissues of pancreatic, ovarian, and lung cancer compared to normal  
60 controls and correlates with poor prognoses. Calcitriol treatment transcriptionally upregulated  
61 PD-L1 gene and protein expression in a panel of cancer cells representing diverse tissue  
62 origins. VDR overexpression (stable and CRISPR directed) increased PD-L1 surface expression  
63 on ovarian and endometrial cancer cells. Interference with Stattic, a STAT3 phosphorylation  
64 inhibitor suggests that vitamin-D/VDR induced PD-L1 expression in pancreatic cancer cells is  
65 channeled through oncogene STAT-3. Calcitriol's postulated role in tumor protection in colon,  
66 breast and pancreatic cancer contradicts Vitamin-D/VDR induced PD-L1 expression which is  
67 shown to promote tumor immune evasion (Sharma et al.,2015). In the context of Vitamin-  
68 D/VDR's association with PD-L1 and oncogene STAT-3, it may appear that a VDR antagonist  
69 would be a better fitting tool to block VDR/PD-L axis than calcitriol which enhances expression  
70 of PD-L1 on tumor cells. In addition to the lack of therapeutic activities in agonists, progress in  
71 targeting VDR is hampered by the unavailability of pharmacologically pure VDR antagonists.  
72 Currently known VDR antagonists carry residual agonistic effects diminishing their  
73 pharmacologic value (Ishizuka et al., 2001). In this report, we demonstrate that Vitamin-D/VDR

74 induced PD-L1 expression on tumor cells is routed through STAT-3, as Stattic, a  
75 phosphorylation inhibitor of STAT-3, abrogated calcitriol induced PD-L1 expression in BXPC-3  
76 and PANC-1 pancreatic cancer cells. To target VDR, we describe the identification of a nuclear  
77 receptor (NR) selective and pharmacologically pure VDR antagonist, MeTC7, which inhibited  
78 PD-L1 surface expression on a panel of human and murine pancreatic, ovarian, breast and lung  
79 cancer cell-lines *in vitro*. Additionally, MeTC7 suppressed PD-L1 upregulation induced by  
80 radiotherapy (RT) in an orthotopic MC38-colorectal cancer model in mice (Gerber et al., 2013).  
81 In this model, MeTC7+RT treatment suppressed immune suppressive CD4<sup>+</sup>T cells (data not  
82 shown) and reduced the population of inflammatory monocytes (IMs) while increasing  
83 CD69<sup>+</sup>/PD-1<sup>+</sup> CD8<sup>+</sup>T cell infiltration in the tumors. Intriguingly, MeTC7 treatment did not affect  
84 the immune niche of TH-MYCN transgenic murine model of neuroblastoma which involves  
85 VDR/MYCN/PD-L1 pathway (Weiss et al., 1997). Instead, MeTC7 blocked VDR/MYCN axis and  
86 controlled THMYCN driven neuroblastoma tumor growth without affecting expression of PD-L1  
87 and other tumor immune markers in the tumors. In this study, association of Vitamin-D/VDR with  
88 PD-L1 and oncogene STAT-3 is shown and the effect of MeTC7 in the context of VDR/PD-L1  
89 and VDR/MYCN/PD-L1 signaling is discussed.

## 90 **Results:**

91 **VDR was overexpressed in malignant tissues and correlated with reduced survival in**  
92 **pancreatic, lung, breast cancer and neuroblastoma patients:** Mining of the publicly available  
93 microarray data at R2-genomics analysis and visualization platform  
94 (<https://hgserver1.amc.nl/cqi-bin/r2/main.cgi>) showed that compared to normal tissues,  
95 malignant tissues of the pancreas ( $p=0.0017$ ), ovary ( $p=6.5e^{-05}$ ) and lung ( $p=5.4e^{-08}$ ) showed  
96 increased VDR mRNA expression (Figure-1A). Similarly, stroma of malignant ovarian tissues  
97 expressed elevated VDR mRNA expression compared to normal ovarian tissues (Figure-1A,  $p=$   
98  $1.2e^{-05}$ ). VDR mRNA was also enriched in the tumor cells from recurrent neuroblastoma

99 (Supplementary Figure-1). Kaplan-Meier survival of patients with lung and pancreatic cancer,  
100 grouped by the extent of VDR expression (from microarray data available at R2-genomics  
101 analysis and visualization platform and Human Protein Atlas (Uhlen et al.,2015), show that  
102 VDR mRNA enrichment significantly correlates with increased mortality (lung:  $p=0.00043$ , and  
103 pancreatic cancer:  $p=0.004$ ) (Figure-1B-C). VDR mRNA enrichment also correlates with  
104 increased mortality in esophageal cancer and neuroblastoma (Figure-1 D-E). Increased  
105 mortality correlating with VDR enrichment was also found to be evident in breast cancer  
106 ( $p=0.011$ ), glioma ( $p=0.0048$ ), cervical cancer ( $p=0.055$ ), liver cancer ( $p=0.048$ ) and bladder  
107 cancer ( $p=0.05$ ) (Supplementary Information-2). Although not statistically significant ( $p=0.09$ ),  
108 the inverse association between VDR mRNA enrichment and mortality of ovarian cancer and  
109 SHH-B medulloblastoma patients was evident too (Supplementary information-2). Similar to  
110 VDR mRNA, VDR protein overexpression in malignant serous and endometrioid ovarian tissues  
111 compared to benign ovarian tissues was observed (Supplementary Figure-3: upper). Similarly,  
112 malignant tissues of cerebellum and fourth ventricle showed elevated VDR protein expression  
113 than normal cerebellum (Supplementary Figure-3: lower). We also analyzed whether the  
114 disease stage had any impact on the inverse association of VDR mRNA with decreased  
115 mortalities in cancer patients. Our analyses showed that among breast cancer patients with  
116 disease stage (IIa or IIb), VDR mRNA enrichment was not associated with increased mortalities  
117 (Supplementary Figure-4A-B). Among pancreatic cancer patients diagnosed with stage IIa and  
118 stage-IIb disease, VDR mRNA enrichment was strongly associated with increased mortalities  
119 (Supplementary Figure-4C-D). However, among ovarian cancer patients diagnosed with  
120 disease stage-II, increased VDR mRNA expression was not associated with increased  
121 mortalities either ( $p=0.19$ ; Supplementary Figure-4E).

122 **VDR overexpression increased surface expression of PD-L1 on cancer cells:** Stably VDR  
123 overexpressing SKOV-3 ovarian cancer cell clones showed increased PD-L1 surface

124 expression (Figure-2A). Immunoblot analyses of the total cell-lysates of VDR overexpressing  
125 SKOV-3 cell clones showed increased PD-L1 expression compared to pCMV (null vector)  
126 transfected control cells (Figure-2B, Left). Conversely, stable VDR knockdown in SKOV-3 cells  
127 resulted in reduced PD-L1 expression compared to null vector (Figure-2B, right). VDR's impact  
128 on the upregulation of PD-L1 was further confirmed by CRISPR mediated VDR overexpression  
129 in ECC-1 endometrial cancer cell-line which also exhibited increased surface expression of PD-  
130 L1 (Figure-2C). RT PCR experiments confirmed that transcripts of both VDR and PD-L1 were  
131 upregulated in ECC-1 cells upon transfection with CRISPR plasmid (Supplementary Figure-5A-  
132 left: histogram; right: expression of VDR and PD-L1 transcripts).

### 133 **Calcitriol upregulated PD-L1 in ovarian, endometrial and pancreatic cancer cells:**

134 Exposure of SKOV-3, OVCAR-8 (ovarian), ECC-1 (endometrial) and PANC-1 (pancreatic)  
135 cancer cells with calcitriol (100nM, 48 hours) showed increased PD-L1 mRNA expression when  
136 analyzed by qPCR (Figure-2D and E). VDR levels, except in SKOV-3 cells, were also increased  
137 compared in OVCAR-8, ECC-1 and PANC-1 cancer cells (Figure-2D-E). Similar to our findings,  
138 Dimitrov *et al.* had previously described Vitamin-D/VDR driven PD-L1 overexpression in human  
139 epithelial cancer cells (Dimitrov et al., 2017).

### 140 **VDR and PD-L1 showed co-localization in ovarian and medulloblastoma tissues:**

141 Confocal microscopy showed that VDR and PD-L1 co-localized in normal, benign, and malignant ovarian  
142 tissues (Figure-2F). In addition to ovarian tissues, ovarian cancer cell-lines SKOV-3 and  
143 OVCAR-8 also showed VDR and PD-L1 co-localization (Figure-2G). Averaged integrated optical  
144 density (IOD) values of the ten randomly selected tumor fields showed increased colocalization  
145 events in malignant and benign ovarian tissues than normal ovarian tissues (IOD values not  
146 shown). Medulloblastoma tissues also showed VDR and PD-L1 co-localization. (Supplementary  
147 Figure-5B). An immunoprecipitation experiment using VDR primary antibody showed  
148 enrichment of PD-L1 in SKOV-3 and OVCAR-8 (Supplementary Figure-5C-Left) and in DAOY

149 and D283 medulloblastoma cells (Supplementary Figure-5C, Right). A two-gene (VDR and PD-  
150 L1) correlation analysis of microarray data available at R2-genomics analysis and visualization  
151 platform showed that VDR and PD-L1 exhibited strong correlation in neuroblastoma ( $r=0.683$ ,  
152  $p=2.5e^{-03}$ ), medulloblastoma ( $r=0.701$ ,  $p=3.6e-03$ ) and esophageal cancer ( $r=0.699$ ,  $p=0.01$ )  
153 (Figure-2H) than pancreatic (Supplementary Figure-5D,  $r=0.255$ ,  $p=0.08$ ) and lung cancer  
154 (Supplementary Figure-5D,  $r=0.478$ ,  $p=2.5e^{-10}$ ).

155 **Vitamin D receptor binds VDRE<sup>CD274 (PD-L1)</sup> and directly regulates PD-L1 expression in**  
156 **PANC-1 cells.** To determine whether Vitamin-D/VDR signaling up-regulates transcription of PD-  
157 L1, we searched for VDRE sequence in PD-L1 gene. In silico analysis of published promoter  
158 sequences of PD-L1 identified VDRE with 100% match (data not shown) between the base-  
159 sequences 829-813 (Figure-2I-J). We employed ChIP assays and conducted PCR of the bound  
160 sequences to confirm VDR binding to the VDRE sequence in PD-L1 promoter zone of PANC-1  
161 cancer cells. Presence of VDRE sequence in anti-VDR antibody immune-precipitated chromatin  
162 sequence and the absence of it in the corresponding IgG control (Figure-2K) indicates that VDR  
163 binds VDRE<sup>CD274 (PD-L1)</sup> and directly regulates PD-L1 expression in PANC1 cells and is  
164 suggestive of potential enhancer activity of VDR/VDRE.

165 **Static treatment abrogated Vitamin-D/VDR induced PD-L1 expression in cancer cell-**  
166 **lines:** In silico analysis of the published PD-L1 promoter sequences revealed the presence of  
167 STAT1/3 and STAT2/5 in promoter zone of PD-L1 (Figure-2J). STAT/3 sequences were  
168 detected between base sequences (-381 and -360) whereas the STAT2/5 were detected  
169 between the sequences (-208 and -181). To capture a glimpse of the mechanism underlying  
170 the Vitamin-D/VDR mediated upregulation of PD-L1, the total cell-lysates of stable VDR  
171 overexpressing SKOV-3 cells were immunoblotted and probed with STAT-3 (phosphorylated  
172 and total). Our western blot analyses showed that stable VDR upregulation in SKOV-3 cells led  
173 to upregulation of PD-L1 and phosphorylated STAT-3 without affecting the expression of

174 GAPDH (internal control) (Figure-3A). A treatment with Stattic (STAT-3 phosphorylation  
175 inhibitor) reduced PD-L1 expression in a stable VDR overexpressing SKOV-3 cell clone (Figure-  
176 3B). Mining of microarray expression of TH-MYCN tumors showed strong correlation in VDR  
177 and STAT-3 expression ( $r=0.919$ ,  $p=1.19e^{-83}$ ) (Figure-3C). Similar strong correlation was also  
178 observed in pancreatic cancer microarrays ( $r=0.553$ ,  $p=9.18e^{-18}$ ) (Figure-3D). A dose-dependent  
179 PD-L1 protein expression was observed upon treatment with calcitriol in BXPC-3 pancreatic  
180 cancer cells (Figure-3E). A 6-hour pretreatment with Stattic (500nM) in serum free medium  
181 blocked calcitriol induced PD-L1 expression in BXPC-3 (Figure-3F). Similarly, in PANC-1  
182 pancreatic cancer cells, pretreatment with Stattic blocked increased transcriptional (Figure-3G)  
183 and protein expression (Figure-3H) of PD-L1 cell suggesting that calcitriol induced PD-L1  
184 upregulation is STAT-3 dependent.

185 **Stable VDR knockdown reduced growth of SKOV-3 xenograft tumors:** To determine the  
186 impact of VDR on tumor growth, we implanted VDR stably overexpressing clones (C12), VDR  
187 knocked down clones (C20) in nude mice subcutaneously along with cohorts implanted with  
188 wild-type SKOV-3 cells, cc clones (control to VDR under expressor C20 clones) and pCMV cell  
189 clones (control to VDR overexpressor cells). The growth of tumors was monitored by measuring  
190 the longest tumor diameter. As shown in the Supplementary Figure-6, compared to wild-type  
191 SKOV-3 cells and stable shRNA scrambled control, stable VDR knockdown SKOV-3 cells  
192 formed significantly slower tumor growth (wild-type vs C20:  $p=0.0004$  ; cc clone vs C20:  
193  $p=0.0062$ ). Surprisingly, C12 (VDR overexpressor clone) did not form an aggressive tumor  
194 phenotype and the difference in the tumor size between wild-type SKOV-3 vs VDR  
195 overexpressor clone (C12) derived xenograft tumors was insignificant (Supplementary Figure-  
196 6).

197 **MeTC7 is a NR selective VDR antagonist:** MeTC7 (Figure-4A) (method of synthesis and  
198 characterization are shown in Supplementary Information-7) showed potent VDR inhibition ( $IC_{50}$



199 = 1.86  $\mu$ M) (Figure-4B, left) in a fluorescence polarization (FP) assay performed using VDR-  
200 LBD and SRC2-3 Alexafluor 647. Fluorescence polarization studies showed that MeTC7 was  
201 void of any VDR agonistic activity (Figure-3B, right). In a cell-based transactivation assay,  
202 MeTC7 inhibited VDR transactivation in the concentration range of 13.58 to 46.28  $\mu$ M (Figure-  
203 4C). MeTC7 showed similar activity as the calcitriol derivative (Cal-DT). In contrast, 7-  
204 dehydrocholesterol (7DHC), the precursor to Vitamin-D biosynthesis showed inhibition of VDR  
205 transactivation only at concentrations above 100 $\mu$ M (Figure-4C). It has been shown that the lack  
206 of NR selectivity is a major challenge with existing NR modulators (Burriss et al., 2013). MeTC7  
207 treatment did not show either agonistic or antagonistic effects on PPAR $\gamma$  (Figure-4D, left and  
208 right), a structurally homologous NR in the VDR family, concentration at or below 100  $\mu$ M.

#### 209 **In Silico studies identified the critical interactions of MeTC7 with VDR-ligand binding**

210 **domain:** *In silico* studies were performed to determine the interactions of MeTC7 with VDR-  
211 ligand binding domain (VDR-LBD) residues to elucidate the structural mechanism behind  
212 antagonistic characteristics of MeTC7. The crystal structure of VDR-LBD (IDB1) co-crystalized  
213 with 2- $\alpha$ -(3-hydroxy-1-propyl) calcitriol (Rochel et al., 2000) was used for docking studies  
214 (Figure-4 E-G). Our docking studies indicate that A-ring subsite (TYR143 and ARG 274  
215 interaction with 1,3-OH of A-ring of calcitriol) was lost when MeTC7 bound with VDR (Figure-  
216 4F). MeTC7 interacts with a strong H-bonding with a backbone of ASP144 and SER 237 in the  
217 ring-A subsite (Figure-4F). MeTC7 utilizes only hydrophobic residues in the 25-OH-subsite,  
218 whereas calcitriol uses a hydrophilic interaction (SER306 & HIS305) as well. Calcitriol may be  
219 visualized to consist of a ring A, a conjugated linker, ring C and D along with a flexible chain as  
220 shown in Figure-4E (left). The simultaneous interactions mediated by C1, C3 and C25-OHs are  
221 crucial for super agonistic behavior of calcitriol. Synchronized interaction is possible only if  
222 correct spacing exists between the hydroxyl groups that are achieved by proper folding within  
223 the molecular structure of calcitriol to favor the correct orientation of hydroxyl group. Structurally,

224 MeTC7 (Figure 4E-right) is larger in size and a conformationally rigid system compared to  
225 calcitriol. To handle this large and rigid molecule, the induced fit docking strategy (Xu et al.,  
226 2013) was implemented that revealed the possible binding mode of MeTC7 with VDR-LBD. The  
227 binding modes of MeTC7 are shown in Figure-4F in comparison with calcitriol. The major  
228 binding motifs (M1 to M4) in MeTC7 have been altered causing antagonistic effects. The  
229 shortening and removal of the C25-OH group near M1 motif of MeTC7 loses interaction with  
230 HIS 305. HIS 305 along with ARG 274 residues play a crucial role in determining the agonistic  
231 behavior of calcitriol and mutations at these residues leads to antagonistic effects (Mizwicki et  
232 al.,2009). The removal of conjugated linker system followed by shortening distance (2.6 Å) in  
233 MeTC7 in comparison to calcitriol (3.7Å) between ring A and C plays a leading factor for  
234 antagonistic behavior of MeTC7. Thus, the strategically placed triazolidine-dione moiety and the  
235 hydrophobic N-methyl group occupy the similar spatial position within VDR as was engaged by  
236 hydrophilic C1-OH of calcitriol. As a result, MeTC7 loses H-bonding with Arg 274, instead uses  
237 the carbonyl group to interact with SER 237 to retain stronger binding. Further, the conjugated  
238 diene linker of calcitriol enters tightly into the hydrophobic cavity of the VDR and agonize the  
239 system (Figure-4G-upper). In contrast, triazolidine-dione moiety of MeTC7 increases the volume  
240 of this VDR-LBD cavity and locks the conformational freedom of VDR due to deeper binding  
241 (Figure-4G-lower).

242 **MeTC7 reduced surface expression of PD-L1 *in vitro*:** Immunoblotting of total cell lysates of  
243 OVCAR-8 (ovarian cancer) and NCI-H460 (lung cancer) cells treated with MeTC7 showed  
244 decreased PD-L1 expression (Figure-5A). Next, flow cytometry was employed to estimate the  
245 drug effect on the surface expression of PD-L1 on a panel of cancer cells after 48 hours of  
246 MeTC7 treatment. The panel of the cells included ovarian (ES2), pancreatic (PANC-1 and  
247 KCKO), lung (H1975) and murine breast cancer (E0771) cells (Figure-5B-G). Flow cytometric  
248 analysis of viable cells selected by live-dead staining demonstrated that MeTC7 treatment

249 resulted in reduced PD-L1 surface expression at concentrations between 100-500 nM  
250 compared to IgG microbeads (Figure-5B-F). Both human (PANC-1, ES2, H1975) and murine  
251 cancer cells (KCKO and E0771) exhibited a decrease in PD-L1 surface expression at 100 nM  
252 except E0771 breast cancer cells, which required 500 nM treatment to exhibit PD-L1 reduction  
253 on the cell surface (Figure-5F). Similarly, MeTC7 (100 nM) treated macrophages showed lower  
254 PD-L1 surface levels compared to vehicle when cells were interrogated by flowcytometry  
255 (Figure-5G).

256

257 **MeTC7 inhibited radiotherapy induced PD-L1 expression in vivo:** Next, we tested if MeTC7  
258 treatment could reduce PD-L1 expression in an *in vivo* inducible PD-L1 activation model. It has  
259 been shown that radiotherapy (RT) induces PD-L1 expression on tumor cells in a MC38 cell  
260 derived syngeneic colorectal cancer model (Wu et al., 2016). To test if MeTC7 could prevent the  
261 RT-induced expression of PD-L1 on tumor cells, mice were injected with MC38 cells  
262 intramuscularly (i.m.) and tumor treated with 15 Gy local irradiation 7 days after inoculation.  
263 Vehicle control or MeTC7 was administered s.c. to mice daily on day 5 until endpoint (day 11)  
264 (Figure-6A, schema). Tumors were removed on day-11, dissociated into a single cell  
265 suspension, and analyzed by flow cytometry. Irradiated MC38 tumor cells exhibited a significant  
266 increase of PD-L1 expression when compared to unirradiated tumors (Figure-6B). Importantly,  
267 MeTC7 (25mg/kg) significantly reduced the surface expression of PD-L1 on tumor cells when  
268 compared to vehicle (Figure-6B). In addition, MeTC7, increased CD8+T-cell (CTLs) infiltration  
269 (Figure-6C). Flowcytometric analysis of the stained cells further showed that CD8+ T cell  
270 expressed increased CD69 and PD-1 activation markers when compared to both vehicle and  
271 RT+vehicle (Figure-6, D-E). Similarly, KLRG+T cells and inflammatory monocyte population in  
272 tumors were found to be significantly decreased in the MeTC7+RT group (Figure-6: F-G).

273 **MeTC7 blocked growth of TH-MYCN transgene driven spontaneous neuroblastoma:** It has  
274 been shown that VDR drives MYCN, which, in turn induces PD-L1 expression on  
275 neuroblastoma tumor cells (Weiss et al., 1997). Therefore, we investigated whether MeTC7 can  
276 inhibit VDR, MYCN and its downstream PD-L1 and other tumor immune markers and control the  
277 tumor growth. TH-MYCN +/+ transgenic mice, which develop spontaneous neuroblastoma  
278 tumors that recapitulate human neuroblastoma disease (Kiyonari et al., 2015). H&E staining of  
279 tumors harvested from homozygous THMYCN+/+ mice (5.5 weeks old) showed strong  
280 presence of VDR, MYCN and TH antigens (Figure-7A). MeTC7 treatment reduced the viability  
281 of tumor spheres isolated from two independent homozygous THMYCN+/+ mice dose  
282 dependently (Figure-7B). Similarly, an MTS cell viability assay run on the tumor cells derived  
283 from three independent homozygous THMYCN+/+ mice showed that MeTC7 treatment was  
284 deleterious to tumor cell's viability which decreased dose-dependently over three days of  
285 treatment monitoring (Figure-7C). Next the efficacy of MeTC7 against growing THMYCN+/+  
286 homozygous tumors was tested in vivo. The response of the drug was monitored using  
287 Ultrasound imaging images and images were reconstructed to capture 3D tumor volume using  
288 inbuilt software. As shown in Figure-7D, MeTC7 (10mg/kg) reduced tumor growth when  
289 compared to vehicle. MeTC7 treatment Analysis of the tumor volume ( $p=0.033$ ) (Figure-7B,  
290 middle) and end tumor weight analysis ( $p=0.053$ ) (Figure-7D) demonstrated the tumor growth  
291 control mounted by MeTC7 treatment. To further validate the antitumor activity of MeTC7  
292 against neuroblastoma, VDR and MYCN positive neuroblastoma xenograft tumors derived from  
293 SHSY5Y and Be2C neuroblastoma cells were treated with MeTC7 (10mg/kg, I.P., M-F). Tumor  
294 growth was monitored by measuring tumor volume ( $\text{length} \times \text{width}^2/0.5$ ) periodically. Analyses of  
295 the tumor growth in the treatment group versus vehicle treated group showed that MeTC7  
296 treatment reduced the growth of both SH-SY5Y ( $p=0.012$ , day:10<sup>th</sup>) and Be2C tumors ( $p=0.08$ ,  
297 day-8th). Comparison of the tumor weights in the vehicle and drug treated Be2C tumors

298 harvested at the conclusion of the experiment demonstrated the tumor growth control mounted  
299 by MeTC7 treatment ( $p=0.058$ ).

300

## 301 **Discussion**

302 VDR enrichment and associated increase in mortalities among patients diagnosed with  
303 pancreatic, ovarian, lung and breast cancer and neuroblastoma; and immune checkpoint  
304 inhibitor ligand PD-L1 and oncogene STAT3 contradicts historically pursued anti-proliferative  
305 functions of Vitamin-D/VDR (Beer et al, 2004 and Trump et al, 2006). Association of Vitamin-  
306 D/VDR with PD-L1 and STAT-3 was established by stable or CRISPR directed VDR  
307 expression, co-localization of VDR with PD-L1 in ovarian cancer and medulloblastoma tissues  
308 and cells, immunoprecipitation of PD-L1 in ovarian cancer (SKOV-3, OVCAR-8) and  
309 medulloblastoma (DAOY, D283) cells via a VDR monoclonal antibody; and strong correlation  
310 ( $r>0.68$ ) of VDR with PD-L1 and STAT-3 in neuroblastoma, pancreatic cancer and other cancer  
311 patient's microarray data (Figure-1H, Supplementary Figure-5D), STAT-3 inhibitor mediated PD-  
312 L1 expression inhibition, and a ChIP assay which showed binding of VDR with VDRE<sup>CD274</sup> and  
313 the in silico analyses that identified presence of VDRE and STAT-3 sequences in the promoter  
314 zone of PD-L1, which, taken together, suggest that aberrant VDR expression can play a role in  
315 tumor immune evasion and ensuing tumorigenesis. Likelihood that VDR is associated with  
316 tumorigenesis is further underlined by polymorphisms in melanoma, lung, pancreatic, prostate,  
317 ovarian and colorectal cancers (Gandini et al., 2014; Mocellin et al., 2008; Lei et al., 2013) that  
318 negatively impacts response to chemotherapy, overall survival, and time to disease progression  
319 (Schultheis et al., 2008, Woo et al., 2012); and VDR enrichment seen in premalignant and early  
320 malignant lesions (Agic et al., 2007) and the VDR mediated epigenetic corruption to block anti-  
321 proliferative genes in cancer cells (Abedin et al., 2006), suggesting that VDR inhibition should  
322 be the preferred approach to control malignancies than the historical approach of activating

323 VDR via calcitriol or its analogs. VDR inhibition can control tumor growth was proven by  
324 reduced growth of VDR knocked down SKOV-3 tumors *in vivo* compared to scrambled vector  
325 and wild-type SKOV-3 controls (Supplementary Figure-6). However, the progress in targeting  
326 VDR has remained hampered by both, the lack of efficacy and hypercalcemia linked to VDR  
327 agonist's use in phase-II/III clinical trials, and the unavailability of pharmacologically pure VDR  
328 antagonists. Literature described VDR antagonists carry residual agonistic effects that hinder  
329 their pharmacologic use in signaling and treatment studies (Ishizuka et al., 2001). Through our  
330 approach of chemical modification of vitamin-d related secosteroidal scaffold that started with  
331 the development of earlier classes of VDR antagonists (MT19c) (Moore RG et al., 2012), we  
332 have now developed MeTC7 which is more potent than MT19 in terms of VDR inhibition  
333 (Figure-4A). MeTC7, obtained by hetero-cyclization of 7-dehydrocholesterol (7DHC) with N-  
334 methyltriazoline-1,2,4-dione (MTAD) and subsequent esterification of the hydroxy-adduct with  
335 bromoacetic acid; is a pure VDR antagonist and is devoid of any agonistic activity and  
336 possesses high nuclear receptor selectivity (Figure-4B-D). We have noticed that  
337 heterocyclization of diene system in secosteroidal structure in Vitamin-D by Diel-Alder reaction  
338 with dienophiles like MTAD and PTAD removes the hypercalcemic liabilities of Vitamin-D and  
339 makes the resultant structures behave like antagonist without any residual agonistic liabilities.  
340 Thus, the development of MeTC7 addresses the need for a pharmacologically pure VDR  
341 antagonist that can be exploited to delineate the effects of VDR and its role in normal and  
342 malignant cells arising from its association with PD-L1 and oncogene STAT-3.

343 Not only did MeTC7 treatment decrease PD-L1 surface expression on pancreatic, ovarian, lung  
344 and breast cancer cells of human and murine origin *in vitro*; the radiotherapy inducible PD-L1  
345 overexpression on MC38 colon cancer cell derived orthotopic tumor cells was significantly  
346 reduced *in vivo* also (Figure-6B). PD-L1 surface expression reduction on colon tumors was  
347 followed by increased CD8+T cell infiltration in tumors (Figure-6C). Further flow-cytometric

348 interrogations showed that the tumor infiltrated CD8+T cells exhibited activation markers (CD69  
349 and PD-1), suggesting that MeTC7 functions as a small molecule therapeutic checkpoint  
350 immunotherapy. Given the association of VDR with PD-L1 and oncogene STAT-3, through  
351 future studies we will interrogate whether MeTC7 mediated PD-L1 inhibition followed by  
352 downregulation of immune suppressive myeloid and inflammatory elements; and increased  
353 infiltration of activated CD8+T cells in radiotherapy treated colon tumors can lead to a  
354 meaningful control tumor growth; and assess whether MeTC7 could overcome the  
355 disadvantages associated with PD-L1/PD-1 targeting antibodies including poor solid tumor  
356 penetration and life-threatening immune adverse reactions (irAEs) (Lee et al., 2017, Gong et al.,  
357 2019). Similarly, while antibodies targeting PD-L1/PD-1 checkpoint axis have shown  
358 unprecedented improvement in tumor control and survival in certain malignancies (Coukas et  
359 al., 2011), limited eligibility of the patients (Zamarin et al., 2018) and life-threatening immune  
360 reactions (Topollian et al., 2012) remain major handicaps against their use. Antibodies also face  
361 *de novo* resistance; and generally, fail to penetrate solid tumor compartments, and are thus,  
362 unable to block secreted PD-L1 which was shown to promote resistance to immune checkpoint  
363 therapies in lung cancer (Gong et al., 2019). Advantages of small molecules include  
364 possibilities of the moderate adverse immune reaction events due to their shorter circulation life  
365 than antibodies, and the benefits of their abilities to penetrate solid tumor compartments to block  
366 the secreted form of PD-L1 which can prevent emergence of resistance against immune  
367 checkpoint therapies (Melaiu et al., 2017). While a small molecule inhibitor of PD-L1 has yet to  
368 be identified, a limited number of molecules that inhibit PD-L1 indirectly have been described  
369 (Prima et al., 2017; Lee et al., 2017). However, CA-170, a dual inhibitor of PD-1 and VISTA, is  
370 the only small molecule that is undergoing clinical trials for immuno-therapeutic treatment of  
371 malignancies (Lee et al., 2017).

372 Next, we attempted to determine whether targeting the VDR can generate a meaningful  
373 antitumor response in an aggressive neuroblastoma animal model that is driven by VDR. It has  
374 been shown that VDR regulates oncogenic transcription factor MYC which drives PD-L1  
375 expression in neuroblastoma cells (Seuter et al., 2013; Salehi-Tabar et al., 2012; Veenstra et al,  
376 1997). PD-L1 expression has been observed in tumor specimens of high-risk neuroblastoma  
377 patients (Chaudhary et al., 2015), and blockade of PD-1/PD-L1 in an animal model was shown  
378 to enhance the outcome of immunotherapy with anti-GD<sub>2</sub> antibody (Ab) ch14.18/CHO  
379 (Rasmusan et al., 2012). Thus, VDR/MYCN/PD-L1 axis in neuroblastoma was found to be an  
380 appropriate model to test the effect of MeTC7 treatment on a TH-MYCN driven spontaneous  
381 neuroblastoma that closely recapitulates human neuroblastoma disease (Wang et al., 2015).  
382 Intriguingly, MeTC7 treatment which blocked MYCN and VDR expression in homozygous TH-  
383 MYCN tumor spheroids and exhibited reduced growth of TH-MYCN driven spontaneous  
384 neuroblastoma tumors in animals did not affect PD-L1 expression on tumors and other critical  
385 tumor immune niche markers (Supplementary Figure-8). Although, it has been suggested that  
386 pharmacologic inhibition of MYCN and MYC may be exploited to target PD-L1 to restore  
387 antitumor immunity in neuroblastoma (Melaiu et al, 2017), antagonizing the PD-1/PD-L1 axis  
388 failed to delay progression of established spontaneous tumors in the TH-MYCN mice (Mao et al,  
389 2016). Promising antitumor effects in spontaneous THMYCN murine neuroblastoma and two  
390 xenograft models may suggest that targeting VDR/MYCN via MeTC7 can emerge as an  
391 effective approach to improve the neuroblastoma patient's survival, utilizing, instead of VDR/PD-  
392 L1, the inhibitory effects on the VDR/MYCN pathway which may be a distinct and targetable  
393 mechanism of tumorigenesis in neuroblastoma.

#### 394 **Materials and Methods:**

395 **VDR expression analyses:** Survival analyses of patients diagnosed with pancreatic, lung,  
396 bladder, esophageal, bladder, neuroblastoma and other malignancies including the correlation



397 of VDR with PD-L1 expression presented in this study (Figure-1, Figure-2H, and Supplementary  
398 Figure-1 and 2 and 5D) were generated by analyzing the microarray data available on the R2-  
399 Genomics Analysis and Visualization Platform (<http://hgserver1.amc.nl>) or on the Human  
400 Protein Atlas web site (<https://www.proteinatlas.org/>). Best system recommended cut-offs were  
401 selected.

402 **Methods of VDR activation and stable knockdown in ovarian cancer cells:** For stable  
403 overexpression of VDR (Figure-2A), human VDR transcript variant 2 cDNA (OriGene,  
404 RC519628) was transfected into the SKOV3 cells using Lipofectamine 2000<sup>TM</sup> (Invitrogen)  
405 following the manufacturer's instructions. Stably transfected cells were selected under the  
406 pressure of 500 $\mu$ g/mL of G418. Cells transfected with empty pCMV6-entry expression vector  
407 were used as control. For stable knockdown, SKOV-3 cells were transfected with human VDR  
408 shRNA (Santa Cruz Biotechnologies, SC-106692-SH) and the stably transfected cells were  
409 generated under 5  $\mu$ g/mL of puromycin pressure. Cells transfected with a scrambled oligo  
410 vector (Plasmid-A, Santa Cruz Biotechnology, SC-108060) were used as control. Single cell  
411 cloning was done by limiting dilution method.

412 **CRISPR directed activation of VDR in ECC-1 endometrial cancer cells:** ECC-1 cells were  
413 seeded at a density of 200,000 cells in 3 ml antibiotic-free standard growth medium per well (6-  
414 well plate) (Figure-2C and Supplementary Figure-5A). After reaching 70% confluency, cells  
415 were transfected with 2  $\mu$ g of plasmid DNA. CRISPR overexpression plasmid DNA (Santa Cruz  
416 Biotechnology, sc-400171-ACT) was first added to OPTI-MEM medium (Gibco, catalog:31985-  
417 070) in a 1.5 mL microcentrifuge tube and allowed to sit for 5 minutes. The transfection reagent  
418 (Lipofectamine 3000; Invitrogen catalog: 1000022234) was added to OPTI-MEM medium in a  
419 microcentrifuge tube and allowed to sit for 5 minutes. The tubes containing plasmid DNA and  
420 transfection reagent were mixed together and allowed to sit for at least 20 minutes. Tubes were  
421 mixed well and 300  $\mu$ L of plasmid DNA/transfection reagent was added to each well. Cells were

422 incubated at 37°C, 5% CO<sub>2</sub> for 24 hours, after which the media was replaced. Three days' post-  
423 transfection cells were maintained under puromycin selection (1 µg/mL). Cells were kept in  
424 puromycin media until antibiotic-resistant clones grew. Once enough antibiotic-resistant cells  
425 were available, they were assayed for VDR protein and transcript levels via Western blotting  
426 and qPCR, respectively. Cells were assayed for PD-L1 surface expression via flow cytometry  
427 using PDL1-BV605 antibody (Biolegend Inc, catalog number:124321) using IgG beads (BD  
428 Biosciences, catalog number:552843) as negative control.

429 **Confocal and immuno-histochemical analyses of tumors:** Immunohistochemical staining  
430 was performed on paraffin-embedded slides of ovarian tissue (normal, benign and malignant)  
431 specimens (thickness 5 µm) as described previously (Moore et al., 2014). Tissue sections were  
432 deparaffinized and rehydrated with serial ethanol dilutions of 100, 95 and 70%. Heat-induced  
433 antigen retrieval was then performed using DAKO Antigen Retrieval Solution for 20 min. Tissue  
434 sections were blocked with normal goat blocking serum (Vector Laboratories) for 60 min at room  
435 temp before incubating with primary antibodies for VDR (Santa Cruz Biotechnologies) and PD-  
436 L1 (Cell Signaling Technologies, 1:200) in a humidified chamber overnight at 4°C. Secondary  
437 antibodies (DyLight 594 goat anti-rabbit IgG, Jackson Immuno-research Laboratories, INC. and  
438 Alexa Fluor 594 goat anti-mouse IgG at 1:500, Invitrogen) were applied and incubated for 60  
439 min for 1 hour at room temperature in the dark. Vectashield medium with DAPI (Vector  
440 Laboratories) was used to mount cover-slips for further analysis. Sixteen bit images were  
441 acquired with a Nikon E800 microscope (Nikon Inc., Mellville NY) using a 40× PlanApo  
442 objective. A Spot II digital camera (Diagnostic Instruments, Sterling Heights MI) was used to  
443 acquire the images (Figure-2E-F and Supplementary Figure: 3 and 5B). The cameras built-in  
444 green filter was used to increase image contrast. Camera settings were based on the brightest  
445 slide. All subsequent images were acquired with the same settings. Image processing and  
446 analysis was performed using iVision (BioVision Technologies, Exton, PA.) image analysis

447 software. Positive staining was defined through intensity thresholding and integrated optical  
448 density (IOD) was calculated by examining the thresholded area multiplied by the mean. All  
449 measurements were performed in pixels. Confocal images were acquired with Nikon C1si  
450 confocal (Nikon Inc. Mellville NY.) using diode lasers 402, 488 and 561. Serial optical sections  
451 were performed with EZ-C1 computer software (Nikon Inc. NY). Z series sections were collected  
452 at 0.3  $\mu\text{m}$  with a 40 $\times$  PlanApo lens and a scan zoom of 2. The gain settings were based on the  
453 brightest slide and kept constant between specimens. Deconvolution and projections were done  
454 in Elements (Nikon Inc. Mellville, NY) computer software. Neuroblastoma tissues were fixed in  
455 10% neutral buffered saline for several days, then dehydrated into paraffin using a Sakura VIP  
456 tissue processor and Sakura Tissue Tek 5 embedding center. Sections of 5-10 $\mu\text{m}$  in thickness  
457 were cut using a Leica RM2265 microtome for staining with either hematoxylin or eosin (H&E)  
458 or immuno-histochemical staining. Immuno-histochemical stains were performed using the GBI  
459 Polink-2 anti-rabbit HRP Plus Detection System (GBI International, D39) or Mouse-on-Mouse  
460 HRP-Polymer Bundle (BioCare Medical) and were counterstained with hematoxylin. Prior to  
461 primary antibody addition, sections were rehydrated, followed by 30 min antigen retrieval in  
462 sodium citrate buffer pH 6.0, and blocked of endogenous peroxidase with hydrogen peroxide.  
463 Primary antibodies used for immunohistochemistry were mouse rabbit anti-VDR (Abcam  
464 ab3508), mouse anti-VDR (Santa Cruz Biotechnology, sc-13133), mouse anti-MYCN (Santa  
465 Cruz Biotechnology, sc-53993), rabbit anti-tyrosine hydroxylase (TH) (Millipore AB152), normal  
466 rabbit IgG (Millipore 12-370), or normal mouse IgG (Millipore 12-371). Slides were visualized  
467 using an Olympus BX41 light microscope and imaged with an Olympus DP70 camera.  
468 Photographs were captured using CellSens digital software.

#### 469 **Chromatin Immunoprecipitation (ChIP)**

470 ChIP assay was performed using the Magna ChIP kit (Millipore, MA, USA) according to the  
471 manufacturer's instructions with minor modification. PANC-1 cells were cross-linked with 1.0%

472 formaldehyde for 10 minutes at room temperature. Sonications were done in nuclear buffer (four  
473 30-s pulses, output 3.0, duty cycle 30% in ice with 120-s rest between pulses; Branson Sonifier  
474 450). A fraction of the mixture of protein-DNA complex was used as “input DNA.” Soluble  
475 chromatin was immunoprecipitated with anti-VDRE antibody (D-6, Santa Cruz Biotechnology  
476 Inc) and normal mouse immunoglobulin G (IgG) (sc-2025, Santa Cruz Biotechnology Inc)  
477 directly conjugated with Magnetic Protein A beads. Immuno-precipitated DNA was eluted and  
478 reverse cross-linked, and then DNA was extracted and purified using a spin filter column. DNA  
479 samples were analyzed by PCR. PCR products were electrophoresed on 1% agarose gel, and  
480 ethidium bromide stained DNA was visualized by a Gel Doc XR+ (Biorad, Hercules, CA).

481 **Synthesis of MeTC7:** Synthesis of MeTC7 is described in Supplementary Information-7A.

482 Structure of MeTC7 was confirmed by  $^1\text{H}$ ,  $^{13}\text{C}$  and correlative NMR experiments  
483 (Supplementary Figure-7B).

484 **Cell culture and cytotoxicity assay:** TH-MYCN+/+ cell lines were derived by mechanical  
485 dissociation of tumors obtained from TH-MYCN homozygous mice (Chesler et al, 2011). These  
486 cells were maintained in RPMI 1640 media (Gibco, catalog number: 11875) supplemented with  
487 20% heat-inactivated FBS,  $10^{-5}$  mM 2-mercaptoethanol, 1 mM sodium pyruvate, and 1Xnon-  
488 essential amino acids (Gibco, catalog number: 11140076). SKOV-3, OVCAR-8, PANC-1,  
489 KCKO, DAOT, D283 and E0771 cells were grown in complete DMEM. ECC-1 and H1975 cells  
490 were grown in complete RPMI medium. MC38 murine colorectal cancer cells were grown in  
491 complete DMEM medium. ES2 was grown in McCoy’s 5A complete medium.

492 **Determination of antagonistic properties of MeTC7 against VDR and PPAR-Y:** Agonistic  
493 and antagonistic activity of MeTC7 against VDR and PPAR-Y was studied using a FP assay  
494 (Feau et al., 2009). This assay was conducted in black polystyrene plates (Corning Inc) using a  
495 buffer [25 mM PIPES (pH 6.75) 50 mM NaCl, 0.01% NP-40, 2% DMSO], VDR-LBD protein (0.1  
496  $\mu\text{M}$ ), LG190187 (3  $\mu\text{M}$ ), and Alexa Fluor 647-labeled SRC2-3 (5 nM). Fluorescence polarization

497 was detected after 1 hour at excitation and emission wavelengths of 650 nm and 665 nm,  
498 respectively. To determine the activity against PPAR $\gamma$ , PPAR $\gamma$ -LBD was expressed in BL21  
499 (DE3) (Invitrogen), purified by affinity chromatography, and stored at  $-80^{\circ}\text{C}$  in buffer (50 mM  
500 Tris (pH 8.0), 25 mM KCl, 2 mM DTT, 10% glycerol, 0.01% NP-40). For the assay, MeTC7 was  
501 serially diluted in DMSO and 100 nL of each concentration was transferred into 20  $\mu\text{L}$  protein  
502 buffer (20 mM TRIS (pH 7.5), 100 mM NaCl, 0.01% NP-40, 2% DMSO, 10 nM DRIP2  
503 (CNTKNHPMLMNLKDNPAQD) labeled with Texas-Red maleimide, and 1  $\mu\text{M}$  PPAR $\gamma$ -LBD) in  
504 the presence and absence of GW1929 (5  $\mu\text{M}$ ) in quadruplet using black 96 well plate (Costar,  
505 catalog number: 3658). The samples were allowed to equilibrate for two hours. Binding was  
506 then measured using fluorescence polarization (excitation 595 nm, emission 615 nm) using a  
507 Tecan M1000 plate reader. The experiments were evaluated using GraphPad Prism 5, and  $\text{IC}_{50}$   
508 values were obtained by fitting the data to an equation (Sigmoidal dose-response-variable slope  
509 (four parameters). Values are given as the mean values of two independent experiments with a  
510 95% confidence interval. The data were analyzed using nonlinear regression with a variable  
511 slope (GraphPad Prism).

512 **Immunoprecipitation of VDR in ovarian cancer and medulloblastoma cells:** Total cell  
513 lysates of ovarian (SKOV-3 and OVCAR-8) cells and medulloblastoma (DAOY and D283) cells  
514 were incubated with a primary VDR antibody (Santa Cruz Biotechnology, catalog number: VDR  
515 antibody (H-81): SC-9164) or a corresponding IgG antibody. The beads were washed  
516 repeatedly with washing buffer. The proteins were separated from the beads and analyzed by  
517 immunoblotting using primary antibodies against VDR and PD-L1. Similarly, the VDR antibody  
518 (Santa Cruz Biotechnology, catalog number: VDR Antibody (H-81): SC-9164) was utilized to  
519 immuno-precipitate PD-L1 from the total cell lysates of DAOY and D283 medulloblastoma cells.  
520 The immunoblots were probed with PD-L1 antibody (Cell Signaling Technology, rabbit mAb,  
521 catalog number: 13684).

522 **Estimation of effect of MeTC7 treatment on surface expression of PD-L1 in cultured**  
523 **cancer cells.** To determine the impact of MeTC7 treatment on total PD-L1 levels in cultured  
524 cancer cells, OVCAR-8 ovarian cancer cells and NCI-H460 lung cancer cells were treated with  
525 MeTC7 (50, 100nM) respectively for overnight. The total cell lysates were probed with the PD-  
526 L1 monoclonal antibody (Cell Signaling Technology, catalog number:13684S, dilution: 1:1000).  
527 GAPDH and  $\beta$ -actin were used as loading control (Figure-5A). To determine the impact of  
528 MeTC7 treatment on surface expression of PD-L1, cultured PANC-1 and KCKO (human and  
529 murine pancreatic cancer cells); ES2 (clear cell ovarian carcinoma cells). NCI-H460 (lung  
530 cancer), E0771 (murine breast cancer cells) and macrophage cells were treated with non-toxic  
531 concentrations (100nM or 500nM for NCI-H1975 and E0771 cells). Prior to treatment with  
532 MeTC7, the donor monocytes were differentiated by treatment with MCSF over a period of 48  
533 hours before treatment with MeTC7 was carried out. The cells were processed and analyzed by  
534 flow cytometry to assess the PD-L1 levels on cells. Anti-mouse IgG antibody coated beads (BD  
535 Biosciences, catalog number: 552843) were used as the internal IgG control. Both PANC-1 and  
536 KCKO cells were treated separately with VDR agonist calcitriol as positive control.

537 **Orthotopic colorectal cancer model of PD-L1 activation:** MC38 tumor cells ( $1 \times 10^5$ ) were  
538 injected intramuscularly in the left legs of female C57BL/6J mice. Sample size consisted of  
539 vehicle (n=5), MeTC7 (n=5), RT(n=5) and RT+MeTC7 (n=5). Mice were treated locally with RT  
540 7 days after tumor cell injection using a 3200 Curie-sealed  $^{137}$ Cesium source that operates at  
541 roughly 1.90 Gy/min. Jigs were constructed and designed to specifically treat the tumor bearing  
542 leg with 15 Gy radiations (Gerber et al., 2013). This source and the collimators used are  
543 calibrated periodically to ensure equal distribution of radiation. Standard caliper was used to  
544 measure tumor growth. Tumor-bearing mice were administered 25 mg/ kg of MeTC7 or vehicle  
545 control (40% Hydroxypropyl-beta-cyclodextrin [Acros Organics] & solutol HS15 [Sigma] in sterile

546 water) subcutaneously (s.c.) 1X/day starting 2 days before RT for the indicated amount of time.

547 Experiment was carried out once.

548 **Flow-cytometric analysis:** Peripheral blood was collected from tail veins at various time points  
549 into tubes containing heparin (Hospira, Inc.). Tumors were removed 4 days post-RT and  
550 processed into single cell suspensions as previously described (Gerber et al., 2013). A total of 1  
551  $\times 10^6$  tumor cells and 15 $\mu$ L of whole blood were blocked with Fc Block (clone 2.4G2) followed by  
552 staining with a cocktail of directly conjugated primary antibodies (Supplementary Information: 9)  
553 for 30 minutes. VDR overexpressing SKOV-3 and ECC-1 cells were processed and stained with  
554 PDL1-BV605 antibody (Biolegend Inc, Catalog number:124321). VDR expressing SKOV-3 and  
555 ECC-1 cells, tumor cells from mice and the peripheral blood cells were washed with 1 mL of  
556 PBS/1% BSA/0.1% azide, fixed with BD Cytotfix/Cytoperm (BD Biosciences), and analyzed  
557 using a 12-color LSRII (BD Biosciences) and FlowJo software (Tree Star). For mice tumor and  
558 blood cells, the data is reported as percent of CD45+ events and normalized per milligram of  
559 tumor where indicated. Anti-mouse IgG antibody coated beads (BD Biosciences, catalog  
560 number: 552843) as internal IgG control.

561 **Efficacy of MeTC7 in THMYCN transgenic neuroblastoma mice:** *TH-MYCN* hemizygous  
562 mice (129X1/SvJ-Tg(*TH-MYCN*)41Waw/Nci) were initially obtained from the NCI Mouse Repository  
563 (strain code 01XD2) and maintained in a 129X1/SvJ background though cross-breeding with  
564 either wild-type 129X1/SvJ mice obtained from The Jackson Laboratory (stock number 000691)  
565 or other *TH-MYCN* hemizygous mice. *TH-MYCN* homozygous mice were identified through  
566 genotyping as previously described (Haraguchi et al., 2009). All mice were maintained on a  
567 breeder diet (Labdiet 5021) and tumor-bearing mice were further supplemented with Diet Gel®  
568 67A (ClearH2O®). Mice in control (n=7), MeTC7 (10mg/kg, n=8) mice were treated  
569 intraperitoneally with indicated doses. Mice in control and MeTC7 (10mg/kg) group received six  
570 treatments in total, whereas the mice in MeTC7(100mg/kg) group were given just three

571 treatments to see the effect of escalated drug dose on tumor burden (data not shown).  
572 Experiment was carried out once. The tumor burden in each mouse was estimated using  
573 ultrasound imaging instrumentation as described below. Portion of tumors from three  
574 homozygous THMYCN+/+ each in control and treatment group were broken into single cell  
575 suspension and tumor immune antigens were analyzed by flow cytometry as described above.  
576 The flow cytometry data is shown in Supplementary Figure-8.

577 **Ultrasound imaging of the TH-MYCN mice:** Tumors in vehicle/drug treated group were  
578 visualized by abdominal ultrasound using a Vevo 3100 Imaging System and MX550D  
579 transducer (FUJIFILM VisualSonics, Inc). Animals were anesthetized (1-3% isoflurane and  
580 oxygen mixture) and restrained on a heated stage with monitors for respiration and  
581 heartbeat. Ventral hair was removed with depilatory cream prior to monitoring with ultrasound  
582 probe. 3D volume measurements were carried out using Amira 6.1 software with a XImagePAC  
583 extension (FEI).

584 **Xenograft animal model:** SKOV-3 (wild-type), pCMV, CC and VDR stably overexpressing  
585 clones (C12) and VDR stably knocked clone (C20) (Supplementary Figure-6) and SHSY5Y and  
586 Be2C (Figure-6E-F) cells isolated from 70-80% confluent petri-dishes were spun down (1000  
587 RPC, 5 minutes). Media was removed and cells (1million) were suspended in matrigel:serum  
588 free RPMI media mix (1:1) and implanted subcutaneously in the right flank of the nude mice. For  
589 SHSY5Y and Be2C cells, NSG mice were used. Prior to inoculation, NSG mice were shaved at  
590 the inoculation site using a clean shaving machine and skin was cleaned using alcohol swabs.  
591 After tumors became palpable, mice were treated with vehicle (n=5 for SKOV-3 clones and n=7  
592 for SHSY5Y and Be2C each) and MeTC7 (n=7) intraperitoneally till tumor volumes [length x  
593 width<sup>2</sup>]/0.5] reached 2000mm<sup>3</sup>. Tumor sizes and animal weights were recorded every third day.  
594 Be2C cells formed highly aggressive tumors and treatment had to be stopped early due to  
595 tumor volume reached 2000mm<sup>3</sup>. Mice in the control and drug groups were euthanized and



596 tumors were harvested. The % change in tumor growth and the difference in the tumor volumes  
597 and tumor weights in the treatment groups were compared to vehicle treated groups using  
598 Graph Prism software.

599 **Statistical analyses:** Statistical analyses of the tumor sizes between the control and MeTC7  
600 treated group were determined using Graphpad Prism 7 software (GraphPad Inc.). Two tailed  
601 unpaired t-test was used to determine the difference between two groups. F-test was conducted  
602 to determine the size of the difference. Ordinary one-way ANOVA test was employed to  
603 determine the statistical difference between groups at multiple time points as the tumor  
604 treatment progressed. Brown-Forsythe and Bartlett's tests were performed to assess the  
605 statistical differences.

606

607

608 **Figures and figure legends**

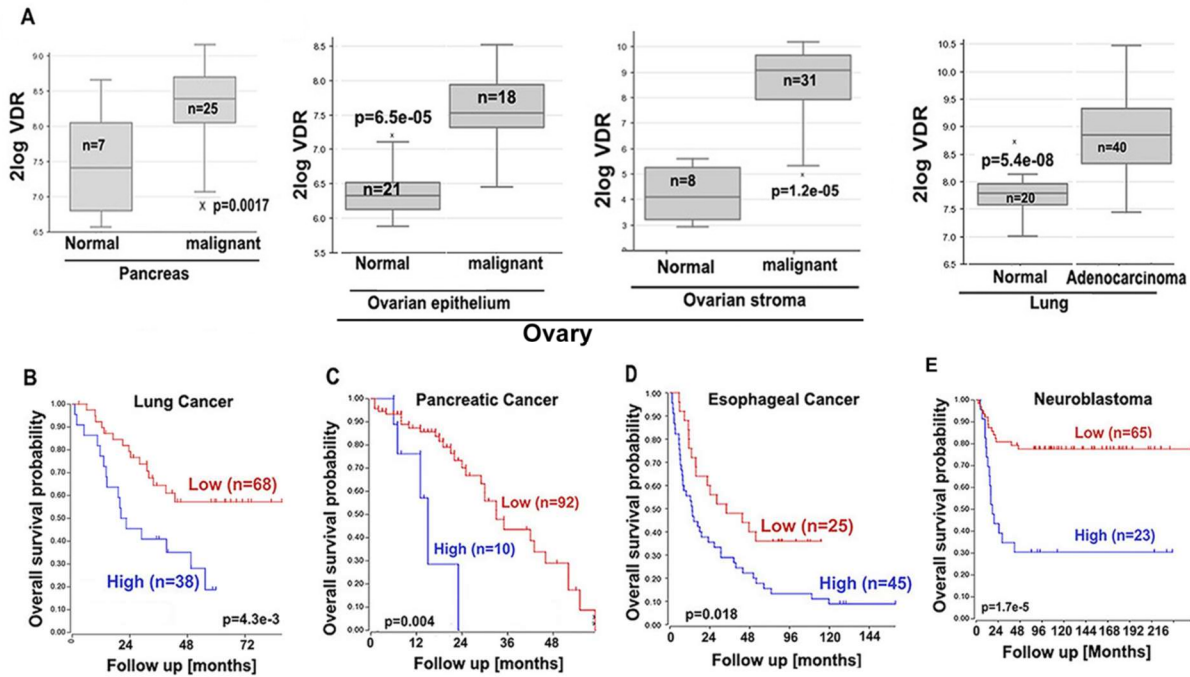

609

610 **Figure-1: (A):** Mining of microarray expression data available at R2 genomics analysis and  
 611 visualization platform showed that VDR mRNA was enriched in the malignant tissues of  
 612 pancreas, ovaries and lung compared to normal tissues. Stroma in ovarian malignant tissues  
 613 also exhibited significantly increased VDR mRNA enrichment (third from left). VDR is also  
 614 enriched in neuroblastoma cells from patients with recurrent/progressed disease  
 615 (Supplementary Figure-1). **(B-E):** Kaplan Meier analyses of the pancreatic, lung,  
 616 neuroblastoma, and esophageal cancer patients using the data and tools available at the R2  
 617 genomics and visualization platform or Human Protein Atlas show that VDR mRNA enrichment  
 618 in lung, pancreatic and esophageal tumors and neuroblastoma correlate with decreased  
 619 survival. Microarray data from breast, glioma, cervical, liver and bladder cancer also show  
 620 statistically significant association of VDR mRNA enrichment with increased mortalities  
 621 (Supplementary Figure-2). Although not statistically significant, microarray data from tumors of  
 622 ovarian cancer ( $p=0.09$ ) and SHH- $\beta$  medulloblastoma ( $p=0.09$ ) exhibited similar trend in the

623 association of decreased survival of patients with increased VDR mRNA expression

624 (Supplementary Figure-2).

625

626

627

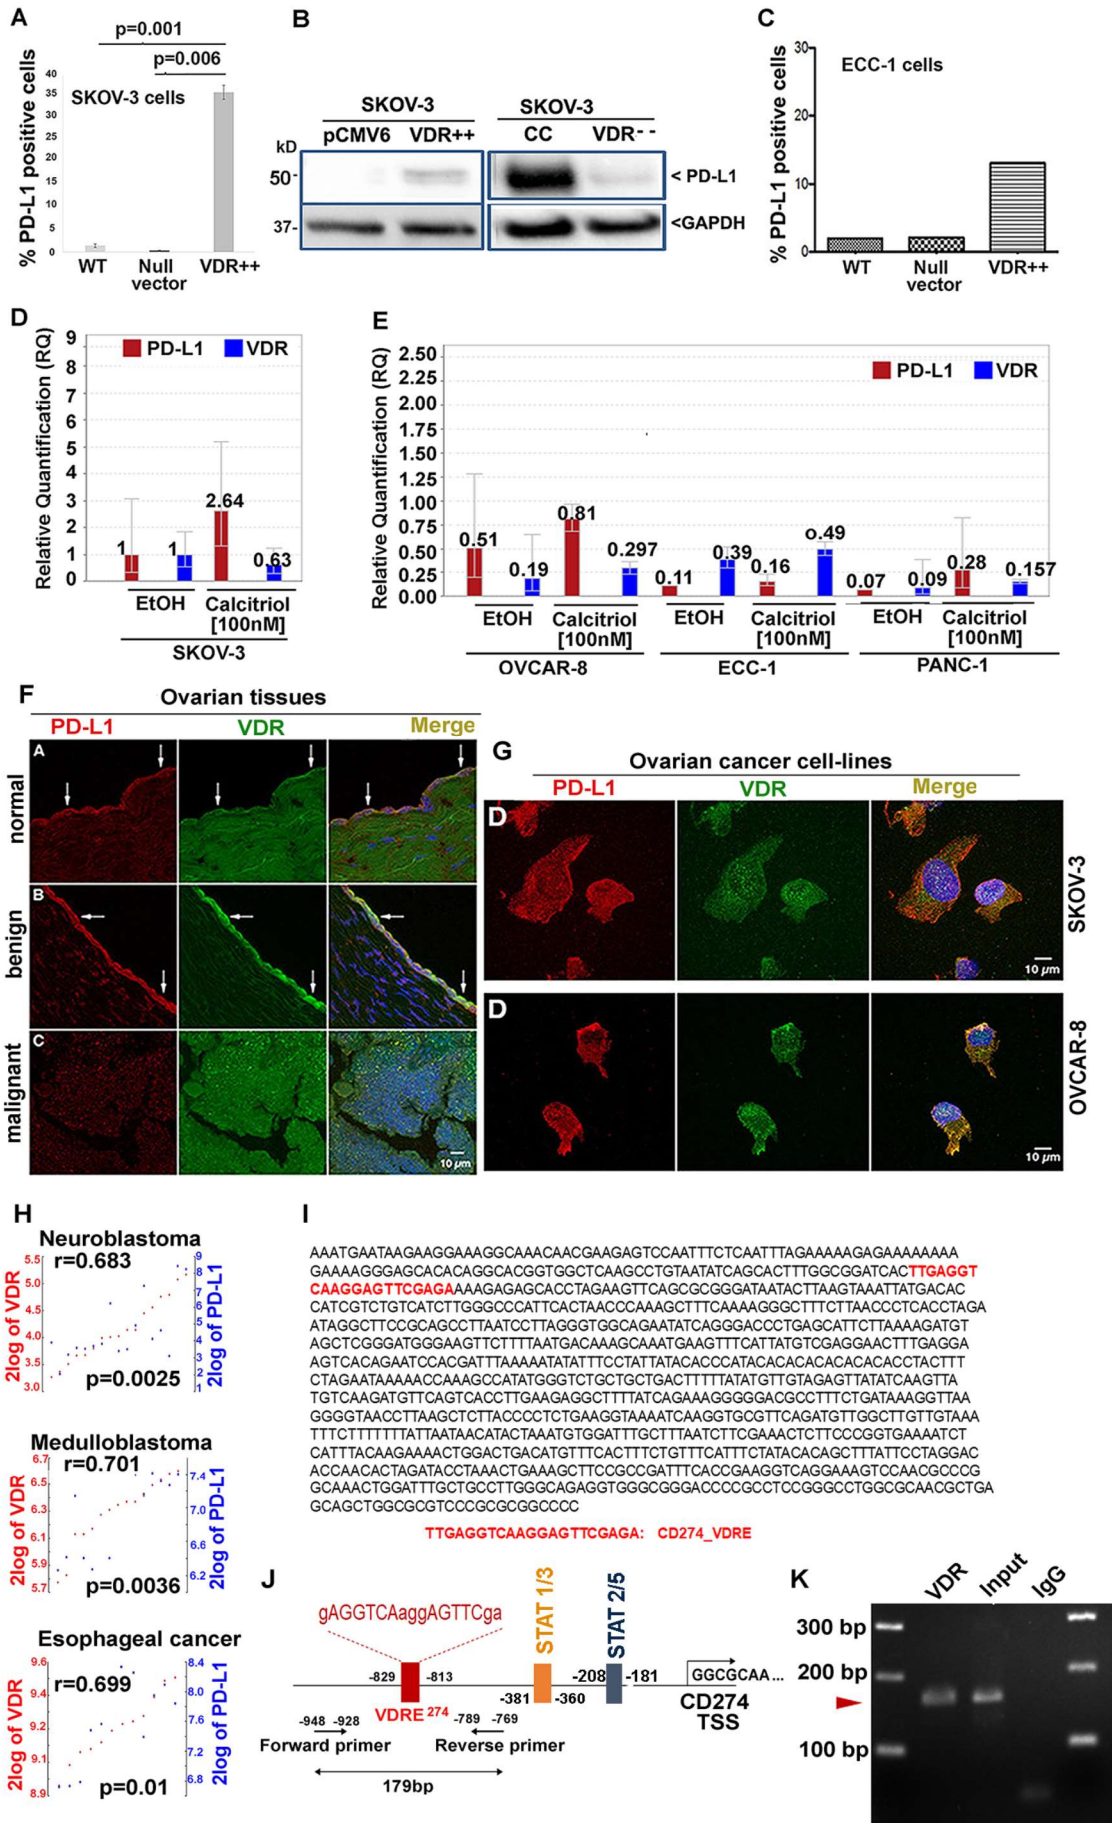

629 **Figure-2: (A):** Stable VDR overexpression in SKOV-3 EOC cells increased surface expression  
630 of PD-L1 compared to control and pCMV6 null vector. Surface expression of PD-L1 was  
631 estimated by flow-cytometry using a PD-L1 antibody (PDL1-BV605, Biolegend Inc, catalog  
632 number: 124321). Anti-IgG kappa beads (BD Biosciences, catalog number:552843) were used  
633 as negative controls. **(B):** Immuno-blot analysis of the total cell-lysates of VDR overexpressing  
634 SKOV-3 clone and null vector showed elevated expression of PD-L1 protein. Stable knockdown  
635 of VDR using shRNA showed decreased PD-L1 protein expression compared to control shRNA  
636 (CC) transfected SKOV-3 cells. Total cell-lysates were probed using PD-L1 antibody (Cell  
637 Signaling Technology, catalog number:13684S, dilution: 1:1000). PVDF membranes were  
638 stripped and re-probed for GAPDH as a loading control. **(C):** VDR upregulation via CRISPR  
639 activation plasmid increased PD-L1 surface expression on ECC-1 endometrial cancer cells.  
640 Both VDR and PD-L1 mRNAs were found to be co-upregulated (Supplementary Figure-5A)  
641 upon VDR overexpression. **(D-E):** SKOV-3 and OVCAR-8 (ovarian cancer), ECC-1 (endometrial  
642 cancer) and PANC-1 cells (pancreatic cancer) were treated with vehicle or calcitriol (100nM) for  
643 48 hours. Relative VDR and PD-L1 mRNA expression in cells was analyzed by qpcr. Relative  
644 Quantification (RQ) values are shown on each bar. **(F-G):** VDR and PD-L1 exhibit co-  
645 localization in normal, benign and malignant ovarian tissues. Randomly selected tissue slides  
646 representing normal ovaries, benign ovaries and malignant serous ovarian tissues obtained  
647 from the pathology archives of Women and Infants Hospital of Rhode Island or (SKOV-3 and  
648 OVCAR-8 cell seeded slides) were processed, fixed and stained overnight with VDR primary  
649 antibody (Santa Cruz Biotechnology, catalog number:SC-9164, dilution: 1:500), washed and  
650 stained with source matched secondary (DyLight-488, Vector Laboratories, catalog number: DL-  
651 1488). Cells were washed and stained again with PD-L1 (Cell Signaling Technology, Mouse  
652 mAb catalog number: 29122, dilution: 1:1000) followed by staining with mouse secondary  
653 DyLight-594 antibody. DAPI containing mounting medium (Vectashield, Vector Laboratories,  
654 catalog number: H-1200) was applied and cover-slipped. Confocal images were recorded as

655 described in material and methods section. Micron bars =10 $\mu$ m. **(H)**: Analysis of microarray  
656 expression data available at R2-genomics analysis and visualization platform showed  
657 statistically strong correlation of VDR and PD-L1 in neuroblastoma, medulloblastoma and  
658 esophageal cancer patients. **(I)**: Sequence of VDRE in PD-L1 promoter zone is shown. **(J)**:  
659 Schema of VDRE, STAT/3 and STAT2/5 sequences and TSS of PD-L1 is shown. **(K)**: CHIP  
660 assay using VDR (D6, sc-13133, Santa Cruz Biotechnology) antibody captured VDRE  
661 sequence in PD-L1 promoter. The sequence of VDRE primers (forward and reverse) are shown  
662 in Supplementary Information-9.

663

664

665

666

667

668

669

670

671

672

673

674

675

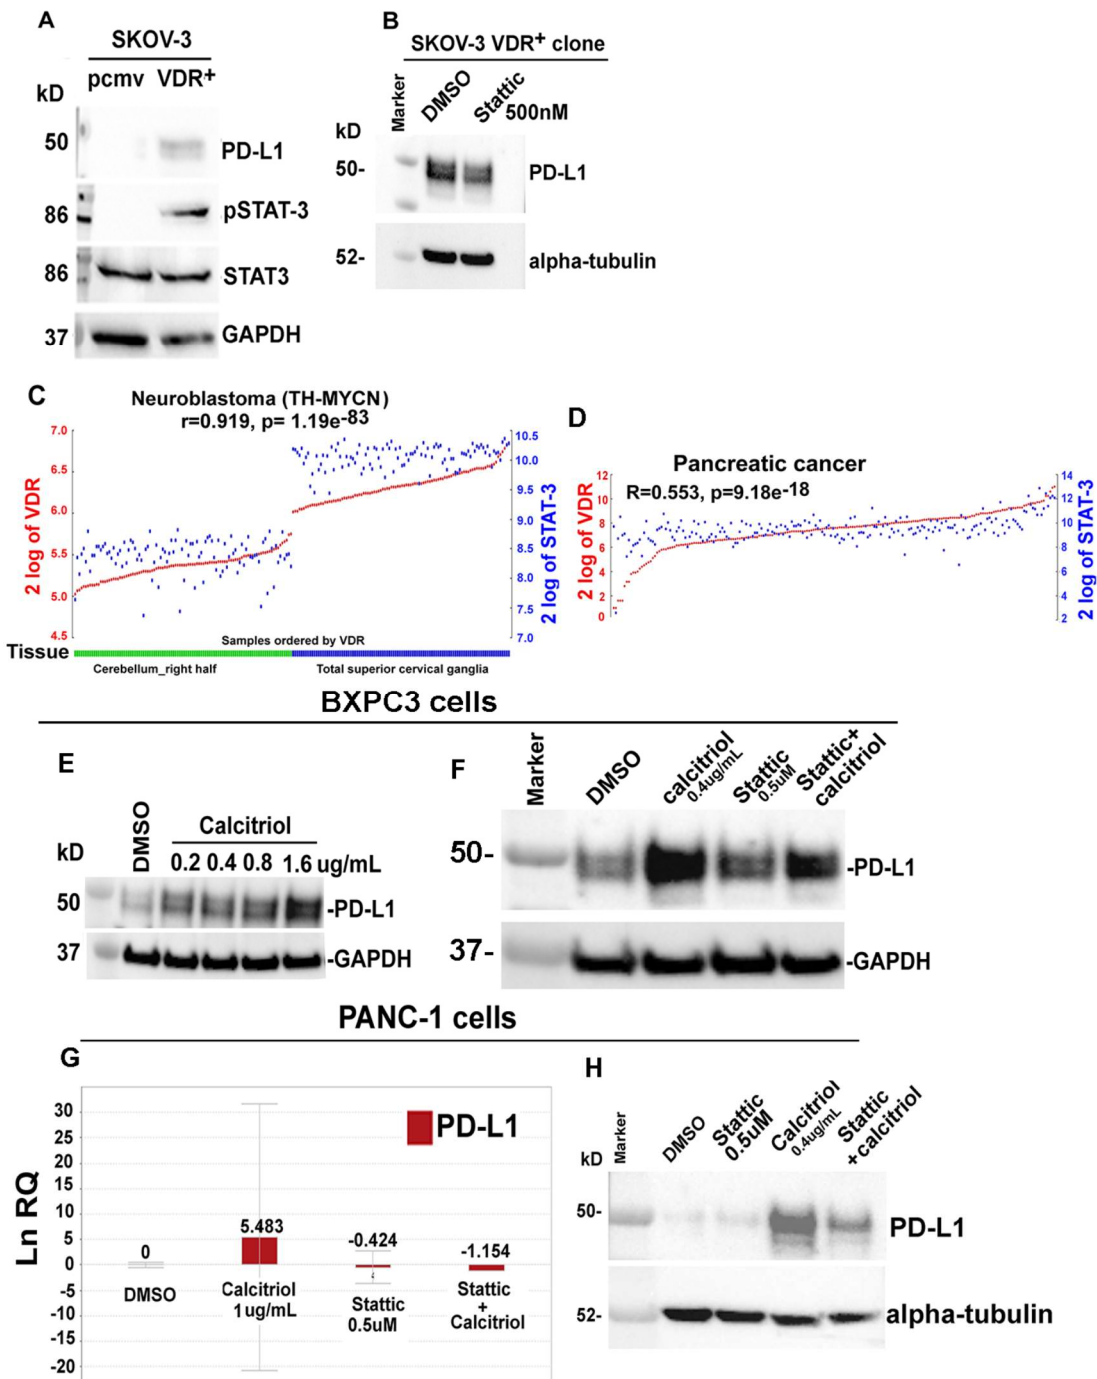

676

677 **Figure-3: (A):** Immunoblotting of VDR overexpressing SKOV-3 cell lysates showed increased  
 678 PD-L1 and STAT-3 phosphorylation (Cell Signaling Technology, catalog number:9145). Total  
 679 STAT3 (Cell Signaling Technology, catalog number: 30835) protein level was not altered. **(B):**

680 Treatment with Stattic (500nM, 24 hours, STAT-3 phosphorylation inhibitor) reduced PD-L1  
681 expression in a stable VDR overexpressing SKOV-3 cell-lines. **(C)**: Mining of a neuroblastoma  
682 microarray database (TH-MYCN, R2-genomics analysis and visualization platform) exhibited  
683 strong correlation of VDR expression with STAT-3 expression ( $r=0.919$ ,  $p=1.19e^{-83}$ ). **(D)**: Mining  
684 of pancreatic cancer database also exhibited strong correlation of VDR and STAT-3 ( $r=0.553$ ,  
685  $p=9.8e^{-18}$ ). **(E)**: Calcitriol (0-1.6ug/mL) dose-dependently increased PD-L1 protein expression in  
686 BXPC-3 pancreatic cancer cells. GAPDH levels were not altered. **(F)**: Stattic (0.5nM) pre-  
687 treatment (6hrs) blocked calcitriol (0.4 $\mu$ g/mL) induced PD-L1 upregulation in BXPC-3 cells.  
688 GAPDH expression was not altered. **(G)**: A 6hrs pretreatment with Stattic (0.5nM) blocked  
689 calcitriol (0.4ug/mL) induced PD-L1 mRNA expression in PANC-1 cancer cells. Naïve or treated  
690 cells were processed, and mRNA expression was analyzed by qPCR. **(H)**: A 6hrs pretreatment  
691 with Stattic (0.5nM) blocked calcitriol(0.4 $\mu$ g/mL) induced PD-L1 protein upregulation in PANC-1  
692 pancreatic cancer cells. Membranes were stripped and re-probed for  $\alpha$ -tubulin expression,  
693 which as a loading control was not altered.

694

695

696

697



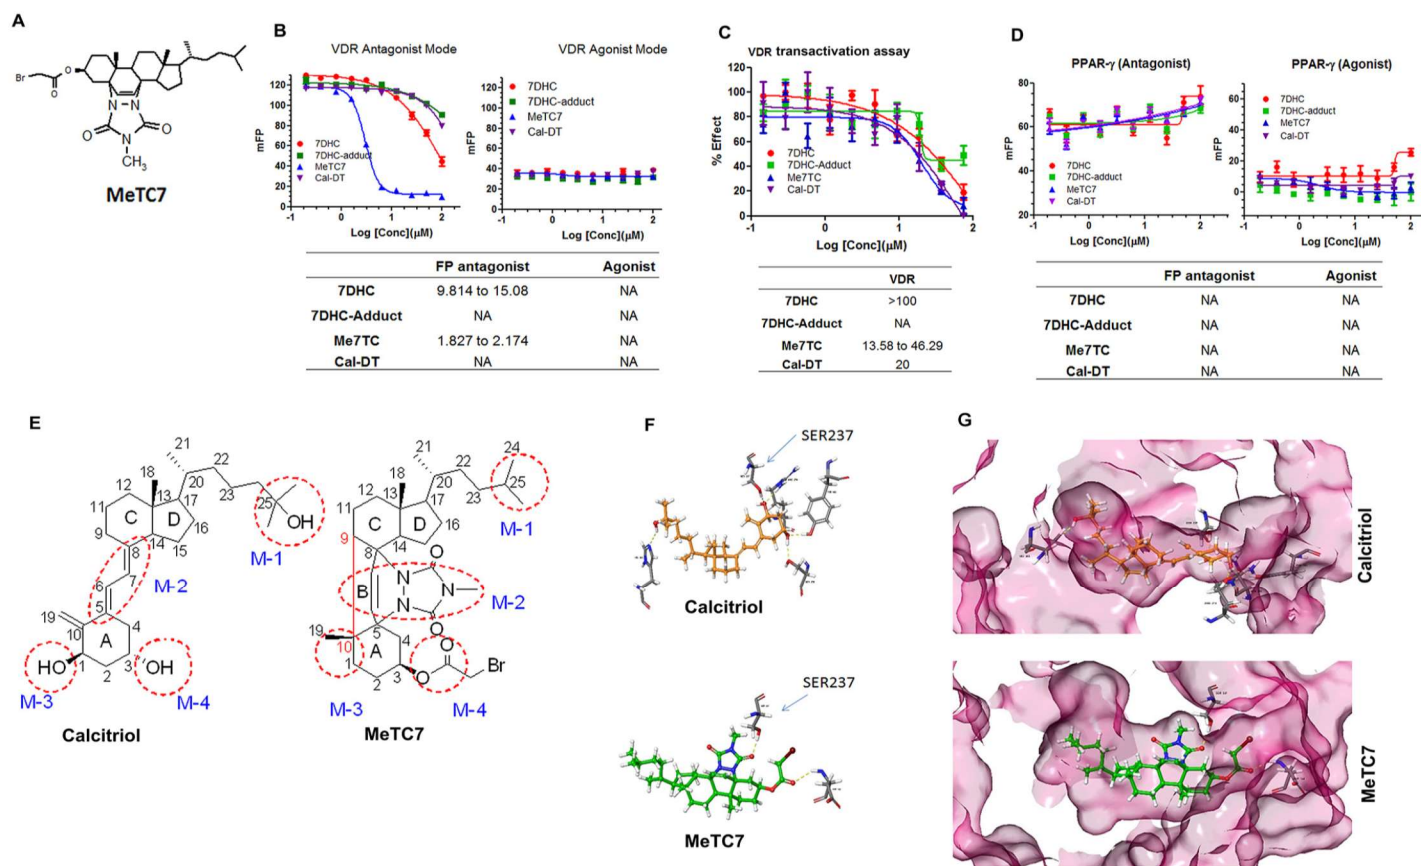

698

699

700 **Figure-4:** (A): Chemical structure of MeTC7. (B): Fluorescence polarization (FP) assay showed  
 701 VDR antagonistic effect (left) without any residual agonistic effects (right). (C): MeTC7 treatment  
 702 inhibited VDR transactivation in a cell-based assay. Interestingly, a calcitriol-adduct (Cal-DT)  
 703 also showed similar inhibitory effect on VDR. (D) MeTC7 did not exhibit any agonistic or  
 704 antagonistic effects against PPAR- $\gamma$ , a nuclear receptor that shares high sequence homology  
 705 with VDR. (E): For *in-silico* binding to VDR, calcitriol (upper, left) and MeTC7 (lower, left) were  
 706 marked into four structurally relevant zones (M1-M4). (F): Key interactions of both calcitriol  
 707 (upper) and MeTC7 (lower) with Ser237 are shown. Snapshots of calcitriol (upper) and MeTC7  
 708 (lower) inserted into VDR-ligand binding domain (LBD) are shown. MeTC7 due to its structural  
 709 bulk distorts VDR-LBD largely.

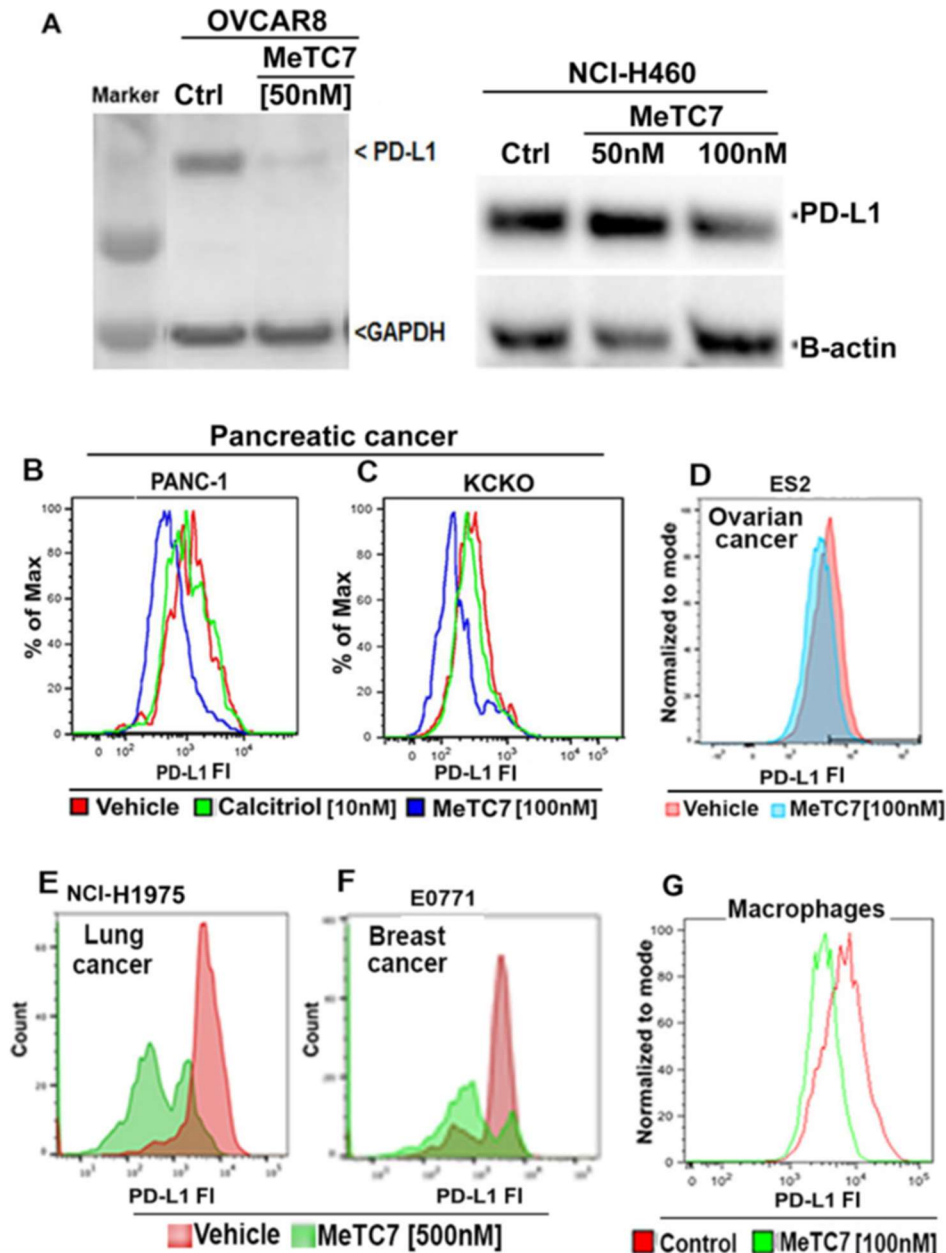

710

711 **Figure-5: (A):** MeTC7 (50-100nM, 48 hours) treatment reduced total PD-L1 levels in OVCAR-8  
 712 and NCI-H460 cells. The total cell lysates of vehicle or MeTC7 treated OVCAR8 and NCI-H460  
 713 cells were analyzed by immunoblotting techniques using PD-L1 monoclonal antibody (Cell  
 714 Signaling Technology, catalog number:13684S, dilution: 1:1000). Either GAPDH or β-actin  
 715 antibodies were used to assess the loading uniformity. **(B-D):** MeTC7 (100nM) treatment for 48  
 716 hours reduced surface expression of PD-L1 on human pancreatic cancer cell-line (PANC-1, **B**)

717 murine pancreatic cancer cell-line (KCKO, **C**) and clear cell ovarian carcinoma cell-line ES2 in  
718 vitro (**D**). Calcitriol was used as a control. (**E-F**). Non-toxic dose of MeTC7 (500nM) reduced  
719 surface expression of PD-L1 expression on H1975 (human lung cancer cell-line) (**E**) and murine  
720 breast cancer cell-line (**F**). (**G**): Similarly, MeTC7 reduced PD-L1 surface expression on  
721 macrophages derived from CLL patient donated monocytes. The donor monocytes were  
722 differentiated by treatment with MCSF for 48 hours prior to treatment with MeTC7.

723

724

725

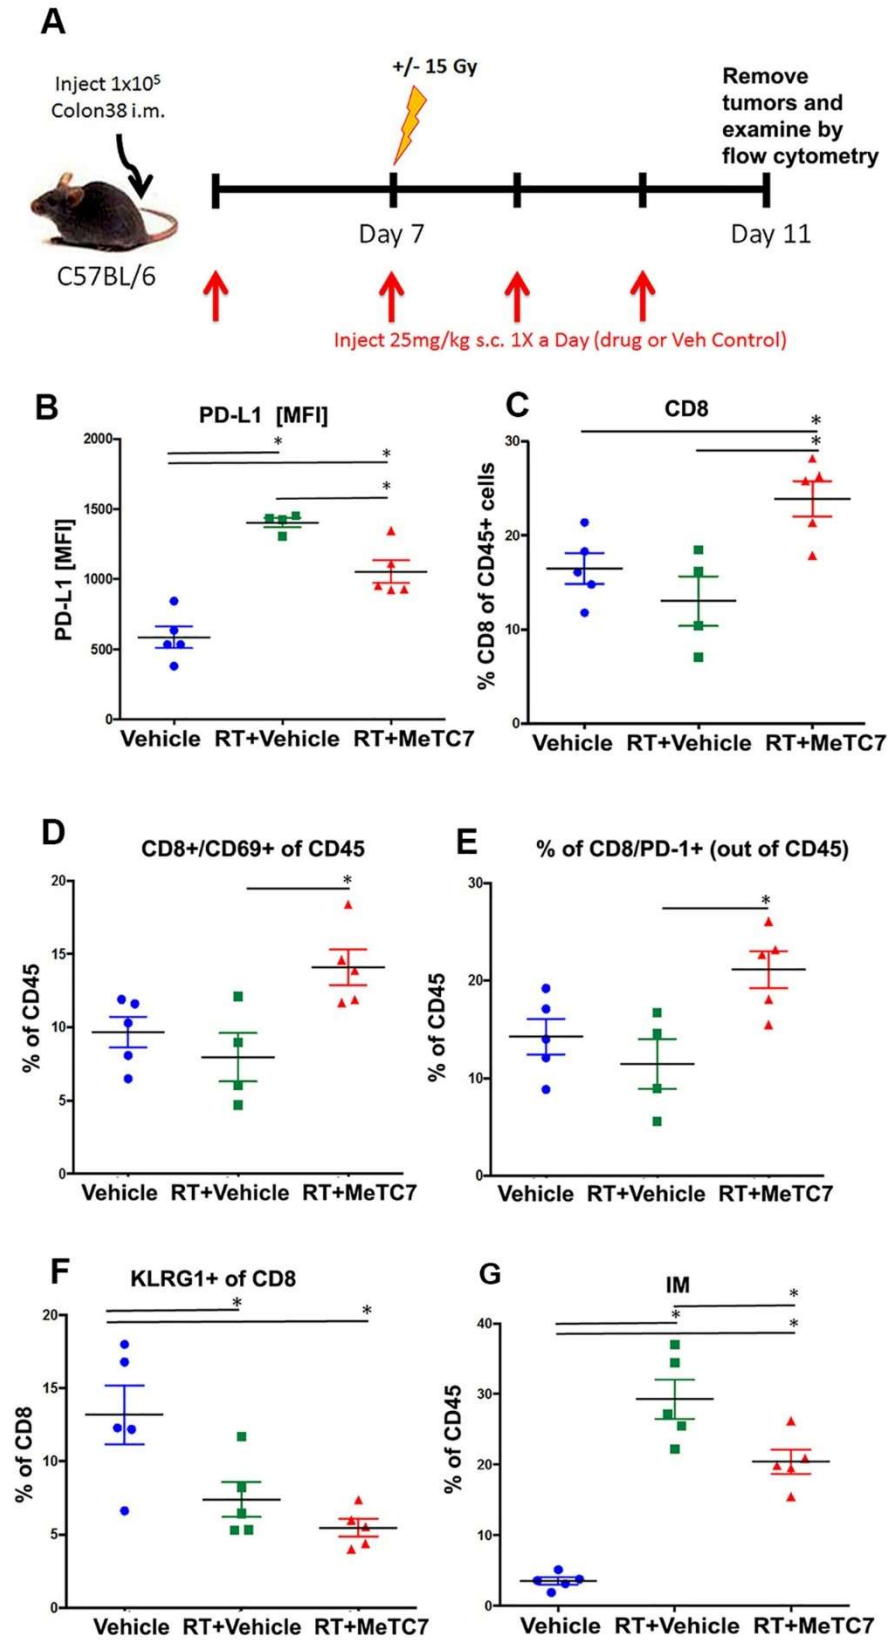

727 **Figure-6: (A):** Schema of evaluation of MeTC7's activity against PD-L1 activated by RT in an  
728 orthotopic model of MC38 colorectal cancer in BL7 mice. Healthy MC38 cells were injected  
729 intra-muscularly in thighs of BL7 mice. On the day-7 mice (vehicle: n=5; MeTC7: n=5; RT: n=5;  
730 RT+MeTC7: n=5) were exposed to 15 Gy RT. MeTC7 at a dose of 25mg/kg subcutaneously  
731 was injected once daily until day 11 when mice were euthanized and tumors were isolated;  
732 fragmented to single cell suspension and analyzed by flow cytometry using a panel of murine  
733 antibodies. Analyses of the data showed that MeTC7 in combination with RT abrogated RT  
734 induced PD-L1 activation in tumors post RT **(B)**, and **(C)** increased CD8+T-cell infiltration in  
735 tumors significantly compared to vehicle or RT+vehicle. **(D):** Combination of MeTC7 with RT  
736 increased activation marker CD69 on CD8+ cells and also PD-1 **(E)**, another key CTL activation  
737 marker, compared to vehicle and vehicle+RT. **(F):** MeTC7+RT treatment reduced KLRG, a  
738 senescence marker of T cell. **(G):** MeTC7+RT treatment also reduced inflammatory monocytes  
739 (IMs). Catalog numbers of the antibodies used are listed in the Supplementary Information-9.

740

741

742

743

744

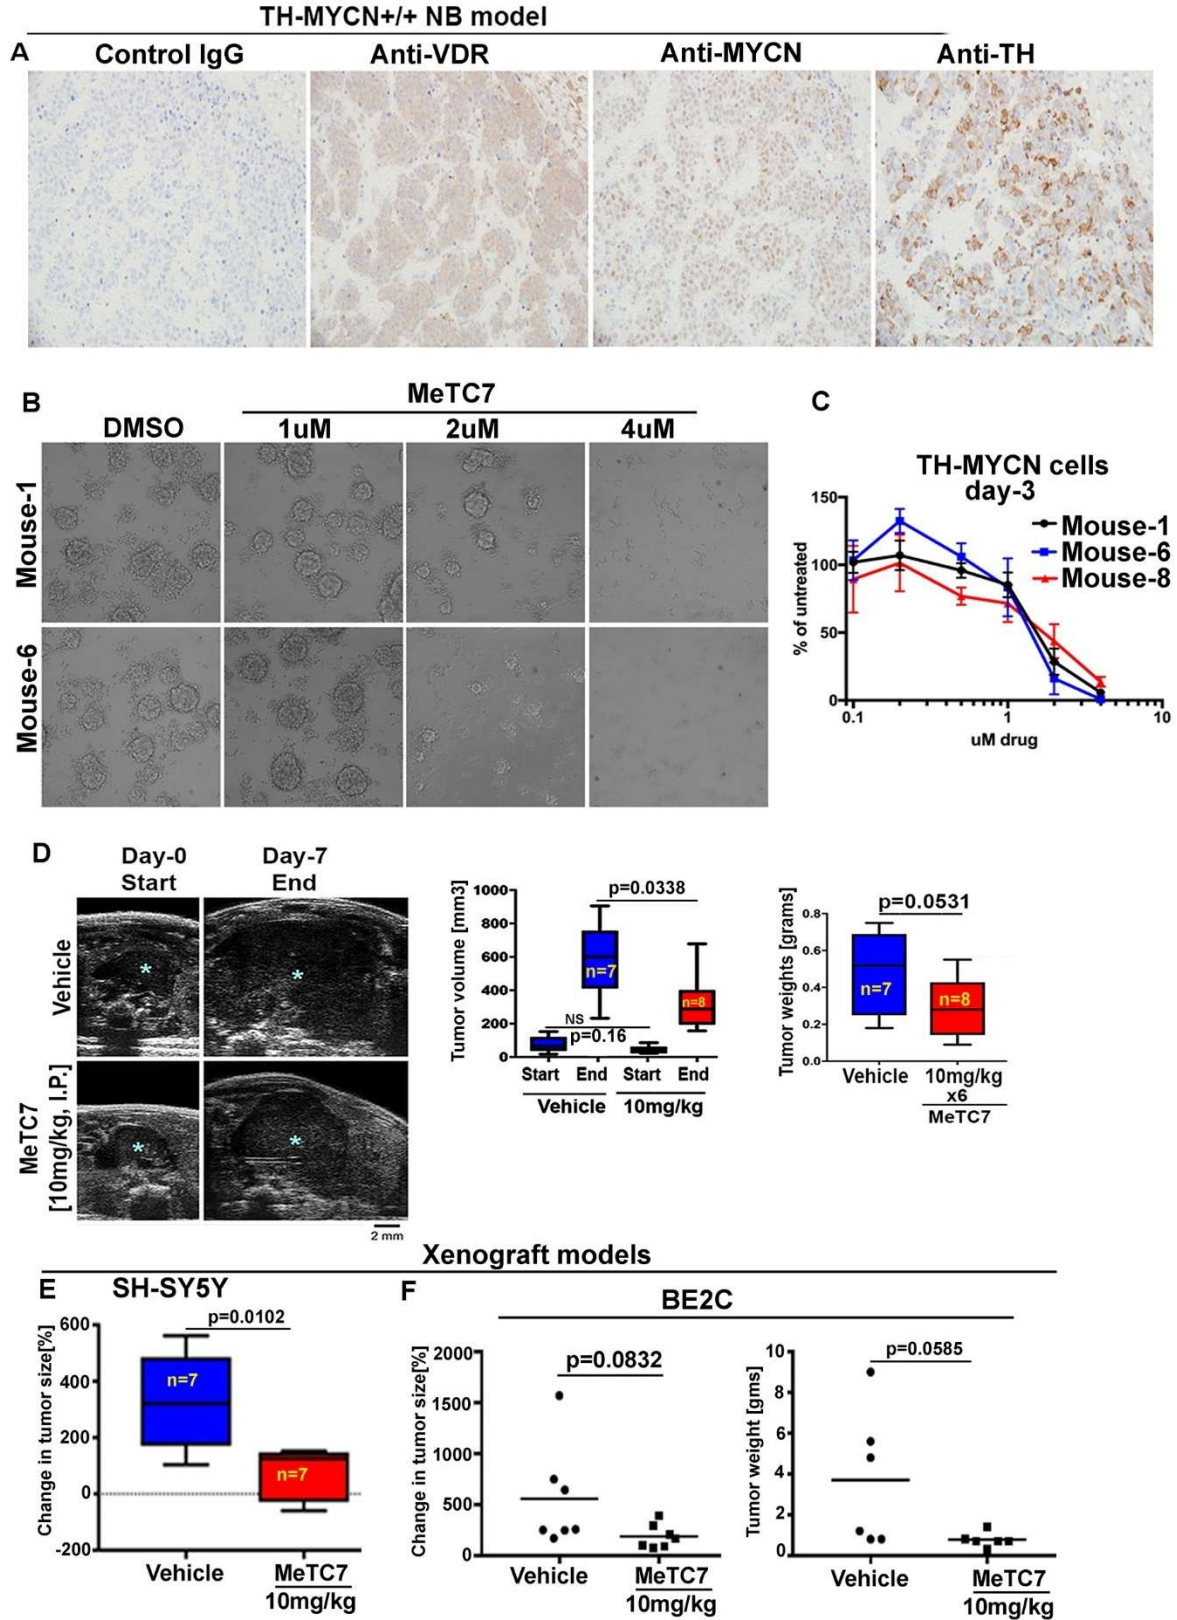

746 **Figure-7: (A):** Tumors from homozygous TH-MYCN (5.5 weeks old) mouse were isolated and  
747 H&E stained with IgG, VDR and MYCN antibodies. Tumors were also stained for the transgene-  
748 TH. Tumors showed strong expression of VDR, MYCN and TH. **(B):** MeTC7 treatment dose-  
749 dependently decreased the viability of murine neuroblastoma tumor spheres isolated from  
750 THMYCN mouse (tags: 1 and 6). Murine tumor sphere cells were grown in complete DMEM  
751 media and treated with varying doses of MeTC7. Representative images of the cells after 24  
752 hours of treatment were recorded. **(C):** MeTC7 treatment reduced the viability of THMYCN  
753 tumor cells isolated from the three independent mice (tags: 1, 6 and 8) during three days of  
754 treatment. **(D):** Antitumor activity of MeTC7 in a TH-MYCN driven model of spontaneous  
755 neuroblastoma. **(D-left):** Compared to vehicle (upper, n=8), MeTC7 (lower, 10mg/kg, I.P., n=8)  
756 treatment reduced growth of THMYCN driven neuroblastoma in transgenic mice. Tumor burden  
757 was measured by an ultrasound imaging instrument. **(D-middle):** MeTC7 treatment dose-  
758 dependently reduced THMYCN tumor volume at the end of the treatment. **(D-middle):** Mice  
759 were euthanized and extracted tumors were weighed. **(E-F):** MeTC7 treatment reduced the  
760 growth of xenograft tumors derived from VDR high expressor neuroblastoma cells-lines (SH-  
761 SY5Y and Be2C). The response of MeTC7 against SHSY5Y xenograft tumors on day-10 of  
762 treatment is shown. Be2C cells (VDR++ and MYCN++) formed very aggressive tumors in mice  
763 and the response of the drug on day-8<sup>th</sup> of the treatment is shown.

764

765 **Acknowledgement:** JNH thanks Dr. Ron Wood and Dr. Deanne Mickelsen for ultrasound  
766 training/assistance. Nicole Romano PhD (Women and Infant's Hospital of Rhode Island) is  
767 acknowledged for staining tumor slides for co-localization studies.

768

769 **Author contribution:** RKS conceived the project, designed and synthesized the MeTC7 and  
770 organized the studies. SAG and YJ designed and completed the evaluation of MeTC7 in  
771 radiation induced PD-L1 activated colon cancer model. JNH designed and performed  
772 experiments related to TH-MYCN model under supervision of NFS. PD-L1 levels on stably  
773 overexpressing SKOV-3 cell or clones thereof were analyzed by RRT. YN developed VDR  
774 stably overexpressing and knockdown clones of SKOV-3. ALA designed and directed the  
775 fluorescence polarization assay to measure agonistic or antagonistic activity against VDR. MS  
776 in supervision of JA developed CRISPR activated ECC-1 clones and measured the PD-L1  
777 levels. MS also measured PD-L1 levels on macrophages. RH performed extensive NMR  
778 experiments to establish the structure of MeTC7. TC conducted the flow cytometry studies on  
779 cells treated with MeTC7. Western blots and pcr experiments were done by AJ, NK, RP and  
780 KKK. RKS wrote the manuscript. TY and TG conducted ChIP assay. DL, MTM, JA, HM, NFS  
781 and RGM analyzed data, reviewed and edited the manuscript or contributed resources.

782 **Competing interests:** RKS and RGM are listed as inventors on a granted US patent.

783

784 **References:**

- 785 Vitamin D in cancer chemoprevention  
786 M Giammanco, D Di Majo, M La Guardia, S Aiello, M Crescimannno, C Flandina, FM  
787 Tumminello, G Leto (2015).  
788 *Pharm Biol.* 53(10):1399-434.  
789 DOI:10.3109/13880209.2014.988274  
790  
791 Calcitriol in cancer treatment: from the lab to the clinic.  
792 Beer TM, Myrthue A (2004)



793 *Molecular Cancer Therapeutics* **3**(3):373-81.

794

795 Vitamin D compounds: clinical development as cancer therapy and prevention agents.

796

797 Trump DL, Muindi J, Fakih M, Yu WD, Johnson CS (2006)

798 *Anticancer Research* **26**(4A):2551-6.

799

800 The future of immune checkpoint therapy.

801 P Sharma and JP Allison (2015)

802 *Science* **348**,56-61.

803 [10.1126/science.aaa8172](https://doi.org/10.1126/science.aaa8172)

804

805 Cancer immunotherapy comes of age.

806 MG Coukos and G Dranoff (2011)

807 *Nature* **480**,480-489.

808 DOI:[10.1038/nature10673](https://doi.org/10.1038/nature10673)

809

810 PD-L1 in tumor microenvironment mediates resistance to oncolytic immunotherapy.

811 D Zamarin, JM Ricca, S Sadekova, A Oseledchyk, Y Yu, WM Blumenschein, J Wong, M

812 Gigoux, T Merghoub, JD Wolchok (2018)

813 *Journal of Clinical Investigation* **128**,5184.

814 <https://doi.org/10.1172/JCI98047>.

815

816 Safety, activity, and immune correlates of anti-PD-1 antibody in cancer.

817 SL Topalian, FS Hodi, JR Brahmer, SN Gettinger, DC Smith, DF McDermott, JD

818 Powderly, RD Carvajal, JA Sosman, MB Atkins, PD Leming, DR Spigel, SJ Antonia, L

819 Horn, CG Drake, DM Pardoll, L Chen, WH Sharfman, RA Anders, JM Taube, TL

820 McMiller, H Xu, AJ Korman, M Jure-Kunkel, S Agrawal, D McDonald, GD Kollia, A  
821 Gupta, JM Wigginton, M Sznol (2012).  
822 *New England Journal of Medicine* **366**,2443–2454.  
823 DOI:[10.1056/NEJMoa1200690](https://doi.org/10.1056/NEJMoa1200690)  
824  
825 Secreted PD-L1 variants mediate resistance to PD-L1 blockade therapy in non-small cell  
826 lung cancer.  
827 B Gong, K Kiyotani, S Sakata, S Nagano, S Kumehara, S Baba, B Besse, N Yanagitani,  
828 L Friboulet, M Nishio, K Takeuchi, H Kawamoto, N Fujita, R Katayama (2019)  
829 *Journal of Experimental Medicine* **216**,982-1000.  
830 DOI:[10.1084/jem.20180870](https://doi.org/10.1084/jem.20180870)  
831 COX2/mPGES1/PGE2 pathway regulates PD-L1 expression in tumor-associated  
832 macrophages and myeloid-derived suppressor cells.  
833 V Prima, LN Kaliberova, S Kaliberov, DT Curiel, S Kusmartsev (2017)  
834 *Proceedings of National Academy of Sciences USA* **114**,1117-1122.  
835 DOI: [10.1073/pnas.1612920114](https://doi.org/10.1073/pnas.1612920114)  
836  
837 Phase 1 trial of CA-170, a novel oral small molecule dual inhibitor of immune  
838 checkpoints PD-1 and VISTA, in patients (pts) with advanced solid tumor or lymphomas.  
839 JJ Lee, JD Powderly, MR Patel, J Brody, EP Hamilton, JR Infante, GS Falchook, HW  
840 Wang, L Adams, L Gong, AW Ma, T Wyant, A Lazorchak, S Agarwal, DP Tuck, A Daud  
841 (2017)  
842 *Journal of Clinical Oncology* **35**, no. 15\_supplement  
843 DOI:[10.1200/JCO.2017.35.15\\_suppl.TPS3099](https://doi.org/10.1200/JCO.2017.35.15_suppl.TPS3099)  
844

845 IFN-gamma mediates the antitumor effects of radiation therapy in a murine colon tumor.

846 SA Gerber, AL Sedlacek, KR Cron, SP Murphy, JG Frelinger, EM Lord (2013)

847 *The American Journal of Pathology* **182**,2345-2354.

848 DOI:[10.1016/j.ajpath.2013.02.041](https://doi.org/10.1016/j.ajpath.2013.02.041)

849

850 Targeted expression of MYCN causes neuroblastoma in transgenic mice.

851 WA Weiss, K Aldape, G Mohapatra, BG Feuerstein, JM Bishop (1997)

852 *Embo Journal* **16**, 2985-2995.

853 DOI:[10.1093/emboj/16.11.2985](https://doi.org/10.1093/emboj/16.11.2985)

854

855 R2 Genomics and Visualization platform. <https://hgserver1.amc.nl/cgi-bin/r2/main.cgi>

856

857 Tissue-based map of the human proteome.

858 M Uhlén, L Fagerberg, BM Hallström, C Lindskog, P Oksvold, A Mardinoglu, Å

859 Sivertsson, C Kampf, E Sjöstedt, A Asplund, I Olsson, K Edlund, E Lundberg, S Navani,

860 C AK Szigartyo, J Odeberg, D Djureinovic, JO Takanen, S Hober, T Alm, PH Edqvist, Ho

861 Berling, H Tegel, J Mulder, J Rockberg, P Nilsson, JM Schwenk, M Hamsten, K von

862 Feilitzén, M Forsberg, L Persson, F Johansson, M Zwahlen, G von Heijne, J Nielsen, F

863 Pontén (2015)

864 *Science* **347**, 260419.

865 DOI: [10.1126/science.1260419](https://doi.org/10.1126/science.1260419)

866

867 Hormonal vitamin D up-regulates tissue-specific PD-L1 and PD-L2 surface glycoprotein

868 expression in humans but not mice.

869 V Dimitrov, M Bouttier, G Boukhaled, R Salehi-Tabar, RG Avramescu, B Memari, B  
870 Hasaj, GL Lukacs, CM Krawczyk, JH White (2017)  
871 *Journal of Biological Chemistry* **292**, 20657-20668.  
872 DOI:[10.1074/jbc.M117.793885](https://doi.org/10.1074/jbc.M117.793885)  
873  
874 Nuclear receptors and their selective pharmacologic modulators.  
875 TP Burris, LA Solt, Y Wang, C Crumbley, S Banerjee, K Griffett, T Lundasen, T Hughes,  
876 DJ Kojetin (2013)  
877 *Pharmacology Reviews* **65**,710-78.  
878 DOI:[10.1124/pr.112.006833](https://doi.org/10.1124/pr.112.006833)  
879  
880 The Crystal structure of the nuclear receptor for vitamin D bound to its natural ligand.  
881 N Rochel, JM Wurtz, A Mitschler, B Klaholz, and D Moras (2000)  
882 *Molecular Cell* **5**,173-179.  
883 DOI:[10.1016/s1097-2765\(00\)80413-x](https://doi.org/10.1016/s1097-2765(00)80413-x)  
884  
885 Induced fit docking, and the use of QM/MM methods in docking.  
886 M Xu and MA Lill (2013)  
887 *Drug Discovery Today Technology* **10**, e411-e418.  
888 DOI:[10.1016/j.ddtec.2013.02.003](https://doi.org/10.1016/j.ddtec.2013.02.003)  
889  
890 On the mechanism underlying (23S)-25-dehydro-1alpha(OH)-vitamin D3-26,23-lactone  
891 antagonism of hVDRwt gene activation and its switch to a superagonist.  
892 MT Mizwicki, CM Bula, P Mahinthichaichan, HL Henry, S Ishizuka, AW Norman (2009)  
893 *Journal of Biological Chemistry* **284**, 36292-301.  
894 DOI:[10.1074/jbc.M109.042069](https://doi.org/10.1074/jbc.M109.042069)

895

896 The role of PD-L1 in the radiation response and clinical outcome for bladder cancer.

897 CT Wu, WC Chen, YH Chang, WY Lin & MF Chen (2016)

898 *Scientific Report* **6**, 19740.

899 DOI:[10.1038/srep19740](https://doi.org/10.1038/srep19740)

900

901 Neuroblastoma models for insights into tumorigenesis and new therapies.

902 S Kiyonari and K Kadomatsu (2015)

903 *Expert Opinion in Drug Discovery* **10**, 53-62.

904 DOI:[10.1517/17460441.2015.974544](https://doi.org/10.1517/17460441.2015.974544)

905

906 Vitamin D receptor polymorphisms and the risk of cutaneous melanoma: a systematic

907 review and meta-analysis.

908 S Mocellin, D Nitti (2008)

909 *Cancer* **113**, 2398-407.

910 DOI:[10.1007/978-1-4939-0437-2\\_5](https://doi.org/10.1007/978-1-4939-0437-2_5)

911

912 Vitamin D receptor polymorphisms and cancer.

913 S Gandini, P Gnagnarella, D Serrano, E Pasquali, S Raimondi (2014)

914 *Advanced Experimental Medical Biology* **810**, 69-105.

915 DOI:[10.1007/978-1-4939-0437-2\\_5](https://doi.org/10.1007/978-1-4939-0437-2_5)

916

917 Polymorphisms and Clinical Outcome in Recurrent Ovarian Cancer Treated with

918 Cyclophosphamide and Bevacizumab.

919 AM Schultheis, G Lurje, KE Rhodes, WZhang, D Yang, AA Garcia, R Morgan, D

920 Gandara, S Scudder, A Oza, H Hirte, G Fleming, L Roman, and HJ Lenz (2008)

921 *Clinical Cancer Research* **14**,7554-7563.  
922 DOI:[10.1158/1078-0432.CCR-08-0351](https://doi.org/10.1158/1078-0432.CCR-08-0351)  
923  
924 Effect of genetic polymorphisms on therapeutic response and clinical outcomes in  
925 pancreatic cancer patients treated with gemcitabine.  
926 HI Woo, KK Kim, H Choi, S Kim, KT Jang, JH Yi, YS Park, JO Park, SY Lee (2012)  
927 *Pharmacogenomics* **13**,1023-1035.  
928 DOI:[10.2217/pgs.12.82](https://doi.org/10.2217/pgs.12.82)  
929  
930 Relative expression of 1,25-dihydroxyvitamin D3 receptor, vitamin D-1 alpha-  
931 hydroxylase, vitamin D 24-hydroxylase, and vitamin D 25-hydroxylase in endometriosis  
932 and gynecologic cancers.  
933 H Agic, C Xu, F. Altgassen, MM Noack, K Wolfler, M Diedrich, RN Friedrich, D Taylor, D  
934 Hornung (2007)  
935 *Reproduction Science* **14**,486-497.  
936 DOI:[10.1177/1933719107304565](https://doi.org/10.1177/1933719107304565)  
937  
938 Epigenetic corruption of VDR signaling in malignancy.  
939 SA Abedin, CM Banwell, KW Colstan, C Carlberg and MJ Campbell (2006)  
940 *Anticancer Research* **26**,2557-2566.  
941  
942 Efficacy of a non-hypercalcemic vitamin-D2 derived anti-cancer agent (MT19c) and  
943 inhibition of fatty acid synthesis in an ovarian cancer xenograft model.  
944 RG Moore, TS Lange, K Robinson, KK Kim, A Uzun, T C Horan, N Kavar, N Yano, SR  
945 Chu, Q Mao, L Brard, ME DePaepe, JF Padbury, LA Arnold, A Brodsky, T Shen, RK  
946 Singh (2012)

947 *PLoS ONE* 7(4): e34443.  
948 <https://doi.org/10.1371/journal.pone.0034443>  
949  
950 (23S)- and (23R)-25-dehydro-1alpha-hydroxyvitamin D(3)-26,23-lactone function as  
951 antagonists of vitamin D receptor-mediated genomic actions of 1alpha,25-  
952 dihydroxyvitamin D(3).  
953 S Ishizuka, D Miura, K Ozono, M Saito, H Eguchi, M Chokki, AW Norman (2001)  
954 *Steroids* **66**,227-237.  
955 DOI:[10.1016/s0039-128x\(00\)00146-x](https://doi.org/10.1016/s0039-128x(00)00146-x)  
956  
957 Dynamics of 1 $\alpha$ ,25-dihydroxyvitamin D3-dependent chromatin accessibility of early  
958 vitamin D receptor target genes.  
959 S Seuter, P Pehkonen, S Heikkinen, C Carlberg (2013)  
960 *Biochimica et Biophysica Acta* **1829**,1266-1275.  
961 DOI:[10.1016/j.bbqrm.2013.10.003](https://doi.org/10.1016/j.bbqrm.2013.10.003)  
962  
963 Vitamin D receptor as a master regulator of the c-MYC/MXD1 network.  
964 R Salehi-Tabar, L Nguyen-Yamamoto, LE Tavera-Mendoza, T Quail, V Dimitrov, BS An,  
965 L Glass, D Goltzman, and JH White (2012)  
966 *Proceedings of National Academy of Sciences USA* **109**,18827-18832.  
967 DOI:[10.1073/pnas.1210037109](https://doi.org/10.1073/pnas.1210037109)  
968  
969 1,25- Dihydroxyvitamin D3 regulates the expression of N-myc, c-myc, protein kinase C,  
970 and transforming growth factor-b2 in neuroblastoma cells.  
971 TD Veenstra, AJ Windebank, R Kumar (1997)

972 *Biochemical and Biophysical Research Communication* **235**, 15-18.

973 DOI:[10.1006/bbrc.1997.6718](https://doi.org/10.1006/bbrc.1997.6718)

974

975 PD-L1 and CD8+PD1+ lymphocytes exist as targets in the pediatric tumor  
976 microenvironment for immunomodulatory therapy.

977 Chowdhury F, Dunn S, Mitchell S, Mellows T, Ashton-Key M, Gray JC (2015)

978 *OncolImmunology* **4**, e1029701.

979 <https://doi.org/10.1080/2162402X.2015.1029701>

980

981 Growth characteristics and spectrum of genetic aberrations in the TH-MYCN mouse  
982 model of neuroblastoma.

983 L Rasmuson, M Segerström, J Nethander, LHM Finnman, N Elfman, N Javanmardi, S

984 Nilsson, JI Johnsen, T Martinsson, P Kogner (2012)

985 Tumor Development.

986 *PLoS ONE* **7**, e51297.

987 DOI:[10.1371/journal.pone.0051297](https://doi.org/10.1371/journal.pone.0051297)

988

989 Augmented expression of MYC and/or MYCN protein defines highly aggressive MYC-  
990 driven neuroblastoma: a children's oncology group study.

991 LL Wang, R Teshiba, N Ikegaki, XX Tang, A Naranjo, WB London, MD Hogarty, JM

992 Gastier-Foster, AT Look, JR Park, JM Maris, SL Cohn, RC Seeger, S Asgharzadeh & H

993 Shimada (2015)

994 *British Journal of Cancer* **113**,57-63.

995 DOI:[10.1038/bjc.2015.188](https://doi.org/10.1038/bjc.2015.188)

996



997 Genetically engineered murine models—contribution to our understanding of the  
998 genetics, molecular pathology and therapeutic targeting of neuroblastoma.  
999 L Chesler, WA Weiss (2011)  
1000 *Seminar in Cancer Biology* **21**, 245-255.  
1001 DOI:[10.1016/j.semancer.2011.09.011](https://doi.org/10.1016/j.semancer.2011.09.011)  
1002  
1003 HE4 (WFDC2) gene overexpression promotes ovarian tumor growth.  
1004 RG Moore, EK Hill, T Horan, N Yano, K Kim, S MacLaughlan, G Lambert-Messerlian,  
1005 YD Tseng, JF Padbury, MC Miller, TS Lange, RK Singh (2014)  
1006 *Scientific Reports*. **6**,3574.  
1007 <https://doi.org/10.1038/srep03574>  
1008  
1009 Novel flufenamic acid analogues as inhibitors of androgen receptor mediated  
1010 transcription.  
1011 C Feau, LA Arnold, A Kosinski, F Zhu, M Connelly (2009)  
1012 *ACS Chemical Biology* **4**,834-843.  
1013 <https://doi.org/10.1021/cb900143a>  
1014  
1015 A simple PCR method for rapid genotype analysis of the TH-MYCN transgenic mouse.  
1016 S Haraguchi, A Nakagawara (2009)  
1017 *PLoS One* **4**, e6902.  
1018 [doi.org/10.1371/journal.pone.0006902](https://doi.org/10.1371/journal.pone.0006902)  
1019  
1020 PD-L1 is a therapeutic target of the bromodomain inhibitor JQ1 and, combined with HLA  
1021 class I, a promising prognostic biomarker in neuroblastoma.

1022 O Melaiu, M Mina, M Chierici, R Boldrini, G Jurman, P Romania, V D'Alicandro, MC  
1023 Benedetti, ACastellano, T Liu, C Furlanello, F Locatelli, and D Fruci (2017)  
1024 *Clin Cancer Res* **23**(15), 4462-4472  
1025 doi: 10.1158/1078-0432.CCR-16-2601  
1026  
1027 Targeting suppressive myeloid cells potentiates checkpoint inhibitors to control  
1028 spontaneous neuroblastoma  
1029 Y Mao, N Eissler, K Le Blanc, JI Johnsen, P Kogner and R Kiessling (2016)  
1030 *Clin Cancer Res* **22**(15), 3849-59  
1031 doi: 10.1158/1078-0432.CCR-15-1912  
1032  
1033  
1034  
1035  
1036  
1037  
1038  
1039  
1040  
1041  
1042  
1043  
1044  
1045  
1046  
1047

1048 **Supplementary Figures**

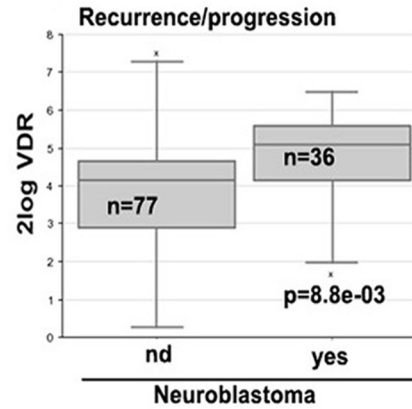

1049

1050 **Supplementary Figure-1:** VDR mRNA is enriched in recurrent/progressed neuroblastoma.

1051 Microarray expression data available at R2 Genomics Analysis and Visualization Platform was  
1052 analyzed using inbuilt tools and the system generated best expression cut-offs were selected.

1053

1054

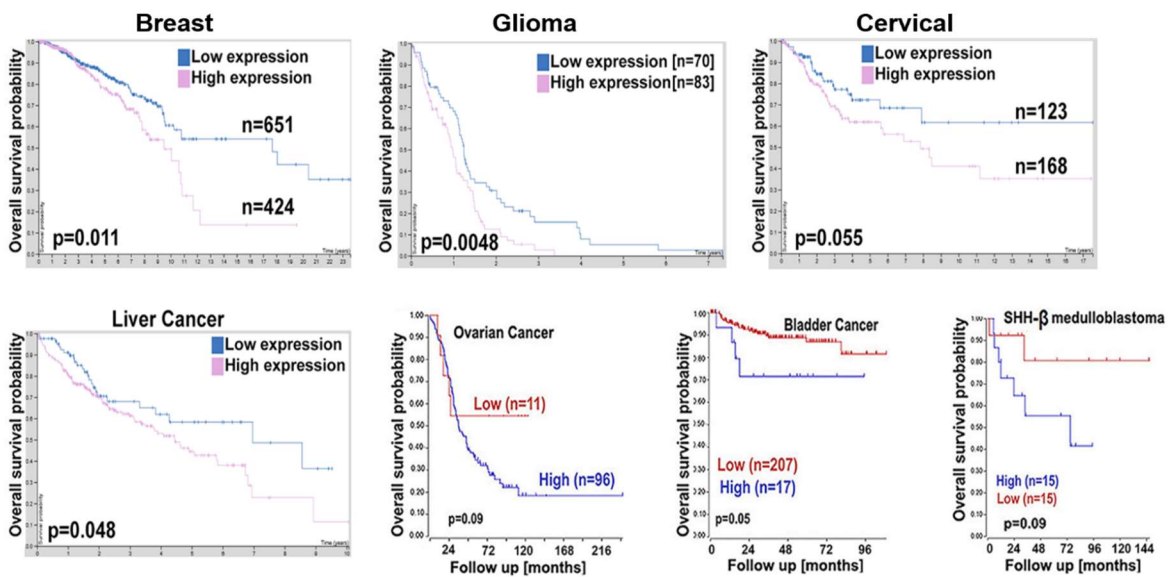

1055

1056 **Supplementary Figure-2:** Kaplan Meier survival analyses of patients with bladder cancer,  
1057 ovarian cancer and SHH-B medulloblastoma, show that VDR mRNA overexpression correlates  
1058 with reduced survival. Microarray expression data available at R2 Genomics Analysis and  
1059 Visualization Platform or Human Protein Atlas were analyzed using inbuilt tools and the system  
1060 generated best expression cut-offs were selected.

1061

1062

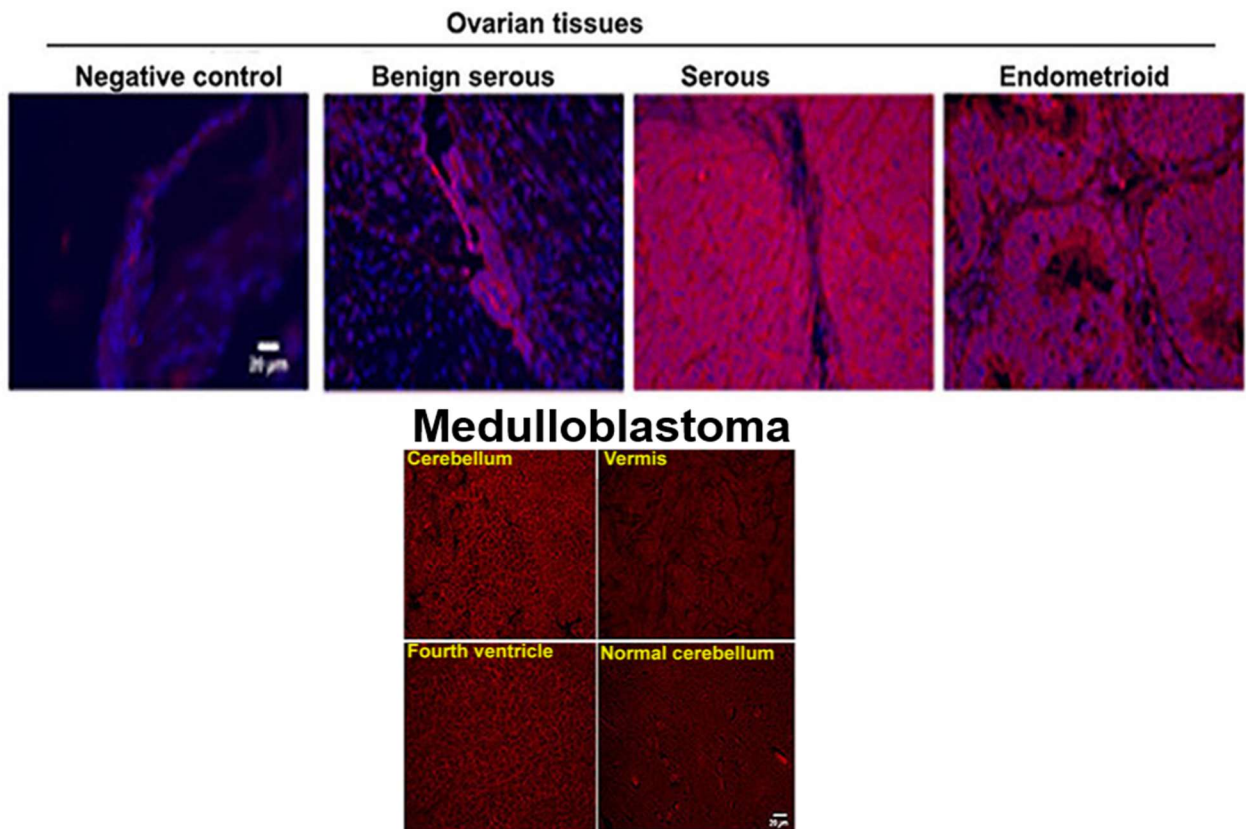

1063

1064 **Supplementary Figure-3: (Upper):** Ovarian cancer tissues showed increased VDR expression  
1065 compared to benign ovarian tissues. The cells were stained with primary VDR antibody and  
1066 subsequently with corresponding secondary DyLight-594 (Vector Laboratories, Catalog number:  
1067 DL2594). The micron bar (20 $\mu$ m) is shown. **(Lower):** Medulloblastoma tumor microarray (US  
1068 Biomax Inc.) was stained with VDR primary and matched DyLight-594(Vector Laboratories,

1069 Catalog number: DI2594). Compared to normal cerebellum, malignant cerebellum and fourth  
1070 ventricle tissues showed increased VDR expression. The micron bar (20 $\mu$ m) is shown.

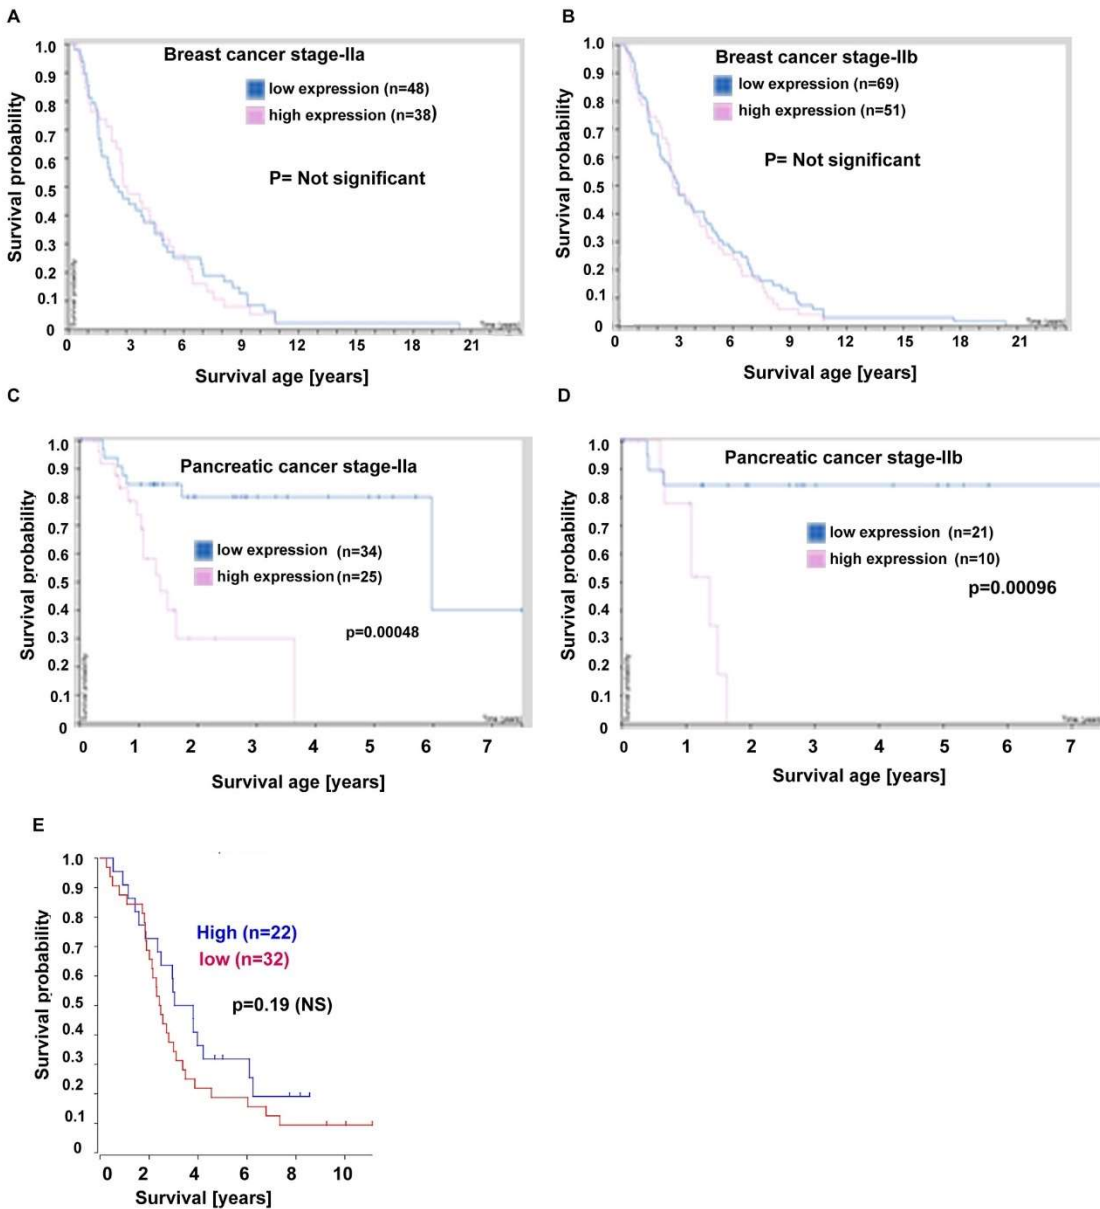

1071

1072 **Supplementary Figure-4:** Impact of VDR mRNA enrichment on survival probability stratified by  
1073 cancer stage. (A-B): Among stage-IIa and IIb breast cancer patients, VDR mRNA enrichment  
1074 was not associated with increased mortalities. (C-D). Among stage-IIa and-IIb pancreatic  
1075 patients VDR mRNA enrichment correlates significantly with increased mortalities. (E): Among

1076 ovarian cancer patients, disease stage (II) did not exhibit association of VDR mRNA enrichment  
1077 with increased mortalities.

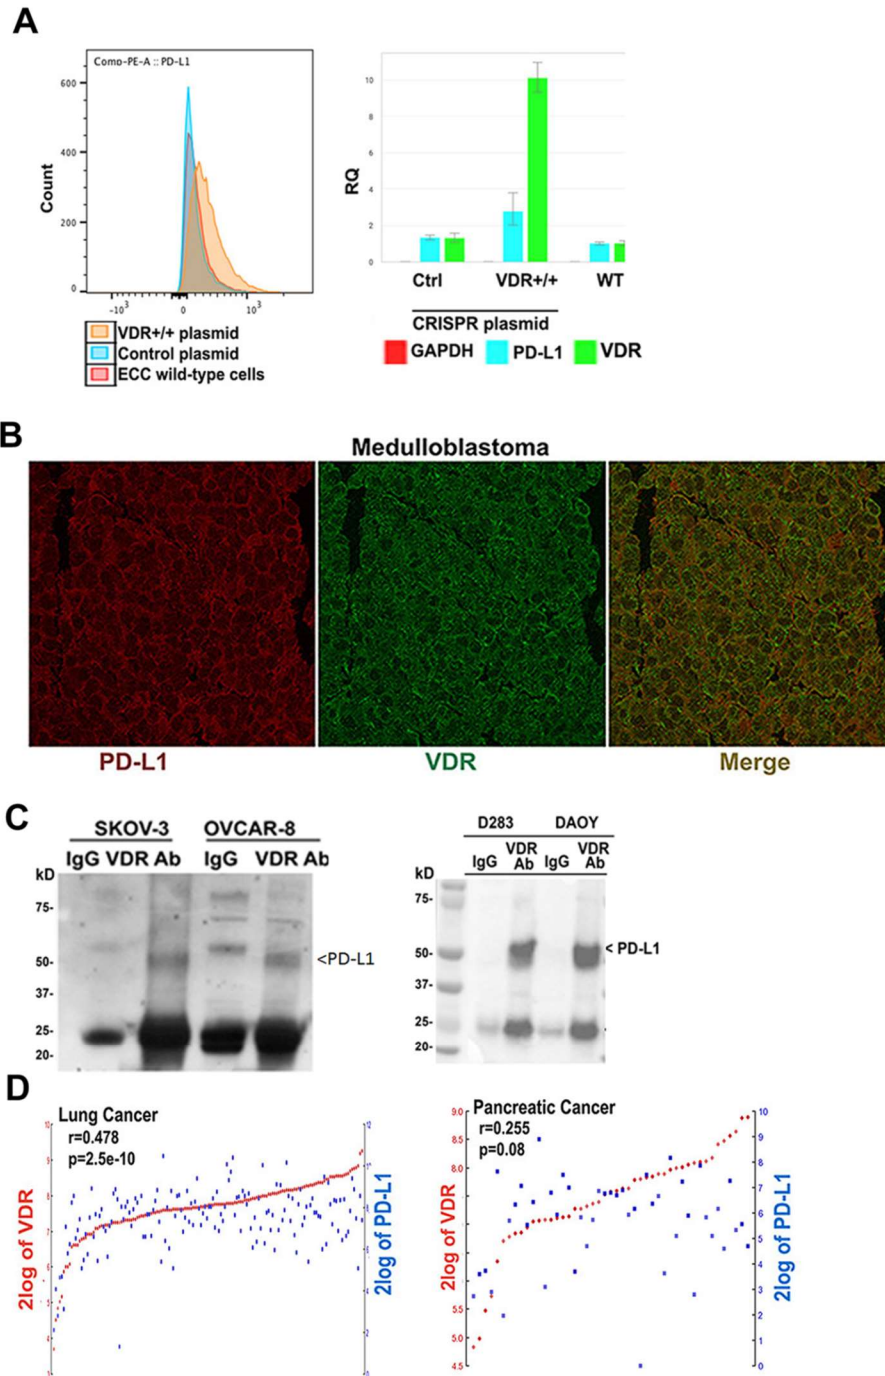

1079 **Supplementary Figure-5: (A):** Flow cytometric analysis showed that CRISPR plasmid  
1080 mediated VDR upregulation resulted in increased surface expression of PD-L1 on ECC-1

1081 endometrial cancer cells. VDR overexpressing plasmid and null vector transfected ECC-1 cells  
1082 were analyzed by flow cytometry using PD-L1 antibody (PDL1-BV605, Biolegend, catalog no:  
1083 124321). Anti-mouse IgG Kappa beads (BD Biosciences, catalog number: 552843) were used  
1084 as the negative control (**B**): VDR and PD-L1 exhibited co-localization in medulloblastoma  
1085 tissues. Medulloblastoma tissues (US Biomax Inc, MD, USA) were processed, fixed and stained  
1086 overnight with VDR primary antibody (Santa Cruz Biotechnology, catalog:SC-9164, dilution:  
1087 1:500). Slides were washed (PBST, 2x10mL, 5 minutes each) and stained with source matched  
1088 secondary (DyLight-488, Vector Laboratories, catalog number: DL-1488) for an hour in dark.  
1089 Tissues were washed (5x 10mL, 5 minutes each) and stained again with PD-L1 (Cell Signaling  
1090 Technology, Mouse mAb catalog number: 29122, dilution: 1:1000) followed by staining with  
1091 mouse secondary DyLight-594 antibody. Slides were bathed in PBST (5x10mL, 5 minutes  
1092 each). DAPI containing mounting medium (Vectashield, Vector Laboratories, catalog number:  
1093 H-1200) was applied and cover-slipped. Confocal images were recorded as described in the  
1094 material and methods section. Micron bars =10 $\mu$ m. (**C**): A monoclonal VDR antibody (Santa  
1095 Cruz Biotechnology, catalog number: H-81; SC-9164) immuno-precipitated PD-L1 from the total  
1096 cell-lysates of SKOV-3 and OVCAR-3 cells. Similarly, the VDR antibody (Santa Cruz  
1097 Biotechnology, catalog number: H-81; SC-9164) immuno-precipitated PD-L1 from the total cell  
1098 lysates of DAOY and D283 medulloblastoma cells. (**D-H**): Two gene correlation analyses  
1099 showed correlation between VDR and PD-L1 in lung ( $r=0.478$ ,  $p=2.5e-10$ ) and pancreatic  
1100 cancer tissues ( $r=0.255$ ,  $p=0.08$ ). Publicly available lung and pancreatic cancer microarray data  
1101 deposited at R2-Genomics Analysis and Visualization Platform were analyzed using their two-  
1102 gene correlation analysis tool.

1103

1104

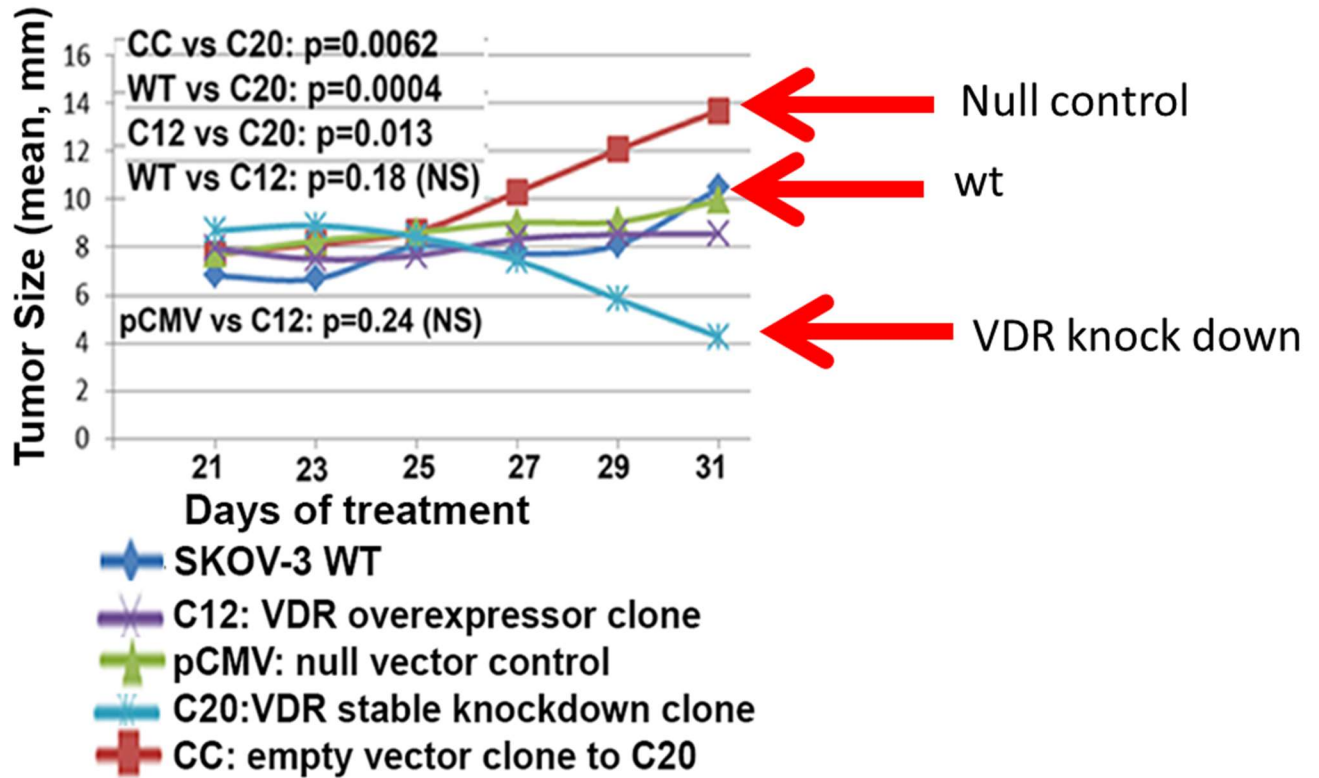

1105

1106 **Supplementary Figure-6:** Stably VDR knock-down SKOV-3 cell clones (C20) showed negative  
1107 tumor growth and burden during 31 days of tumor burden monitoring compared to wild-type  
1108 SKOV-3, CC scrambled control, VDR high expressor clones (C12) and pCMV null vector  
1109 transfected SKOV-3 cell clones. 1 million cells of wild-type and stably VDR overexpressing and  
1110 under-expressing clones and their control counterparts were inoculated in nude mice. The tumor  
1111 growth was monitored via measuring the longest diameter. Reduced tumor growth shown by  
1112 clone-C20 (VDR knock-down) provided the key rationale that inhibiting VDR may reduce tumor  
1113 burden.

1114

1115 **Supplementary Information-7a:**

1116 **Method of Synthesis:** 7DHC (Sigma Aldrich) was stirred with N-methyl-1,2,4- triazolinedione  
1117 (0.1:0.1 molar ratio) in dichloromethane at 0°C. Within four hours the pink color was found to be



1118 disappeared. The separated product (adduct) was filtered and coupled with bromoacetic acid in  
1119 presence of DCC and catalytic amount of DMAP. Dichloromethane was removed using Buchi  
1120 rotavapor and the crude product obtained was purified using a preparative thin layer  
1121 chromatography plate. The band containing the product was collected and the compound was  
1122 stripped off the silica gel by washing through MeOH:DCM (9:1). The solvent was removed using  
1123 rotary evaporator and the compound (MeTC7) was collected after drying under vacuum as an  
1124 off-white powder. The compound was stored at -20°C till used.

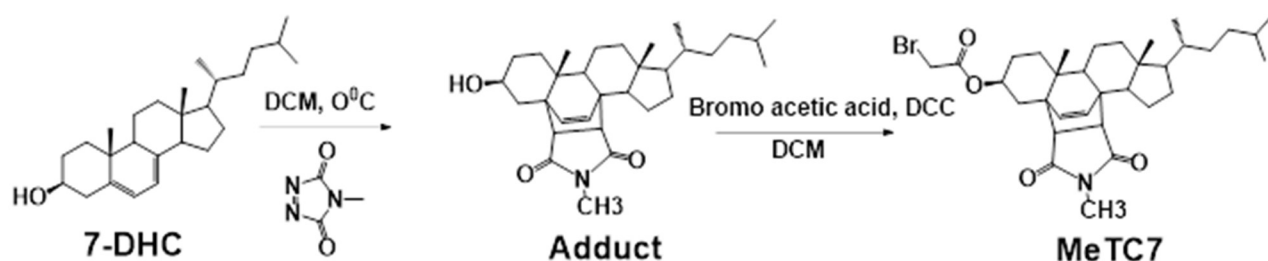

1125

1126

**Scheme of synthesis of MeTC7**

1127

1128

1129 **Supplementary Data-7B:**

1130 1. <sup>1</sup>H NMR and <sup>13</sup>C NMR data

1131 2. <sup>1</sup>H-<sup>1</sup>H COSY data

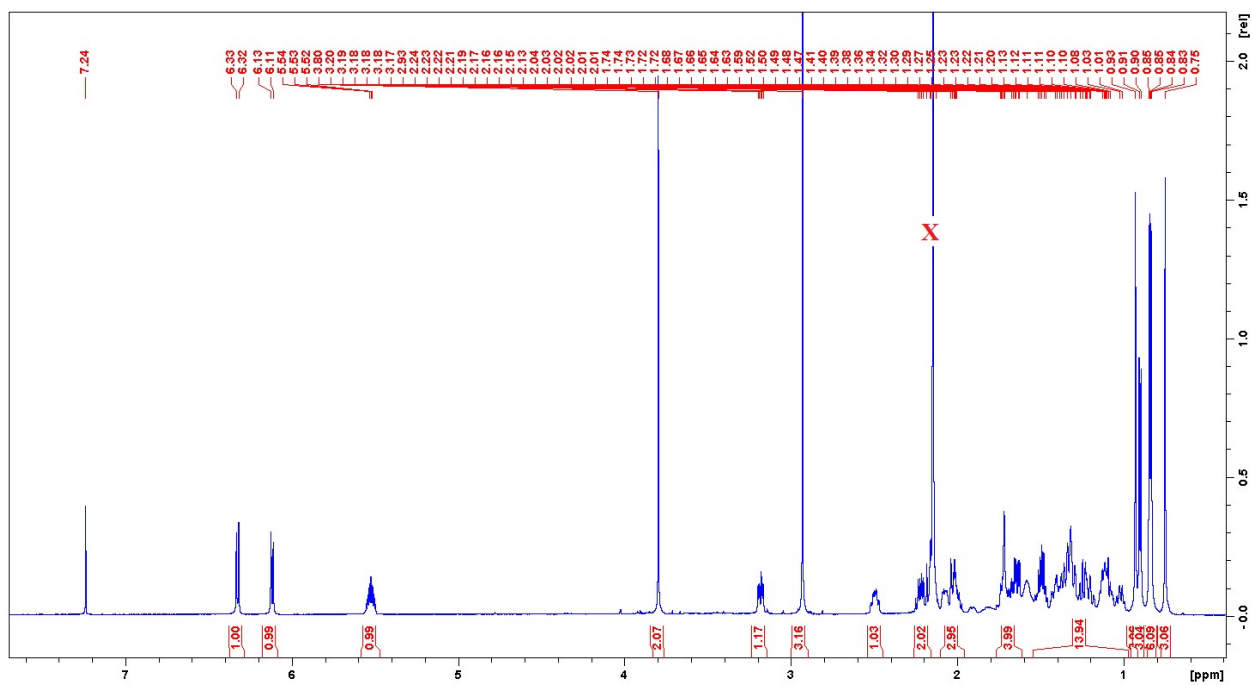

1132

1133 **Figure-7B-1: 1H NMR profile of MeTC7**

1134

1135

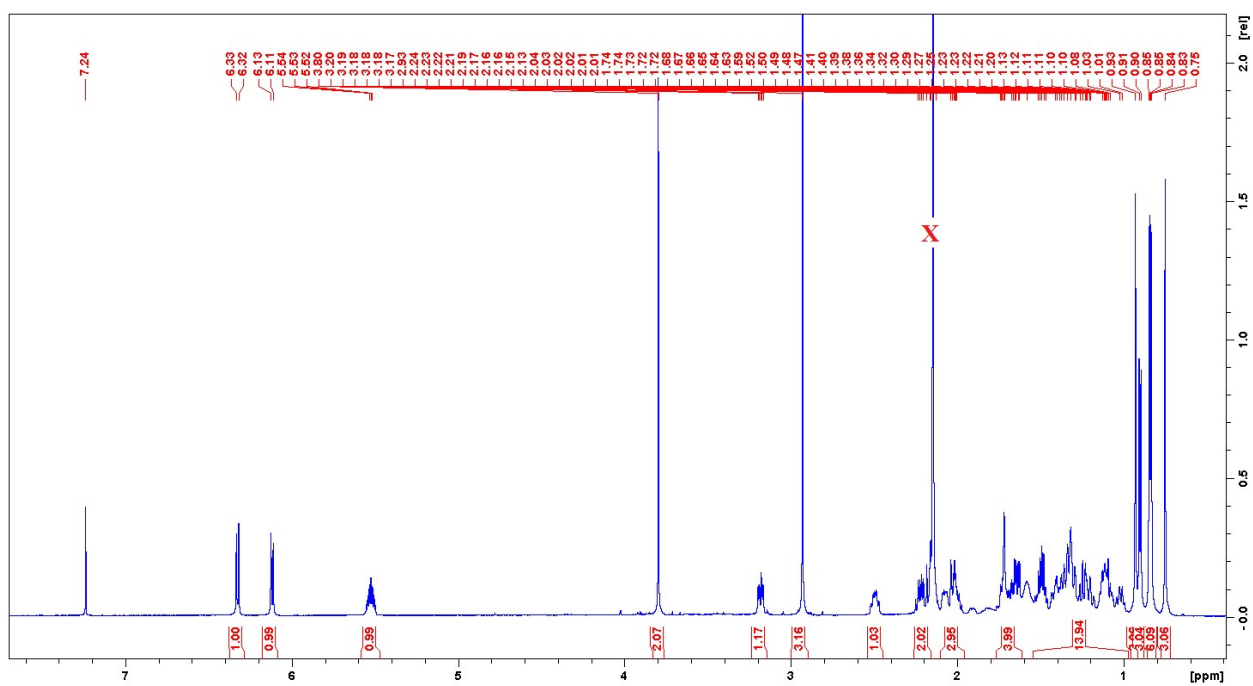

1136

1137 **Figure-7B-2:**  $^{13}\text{C}$  NMR profile of MeTC7

1138

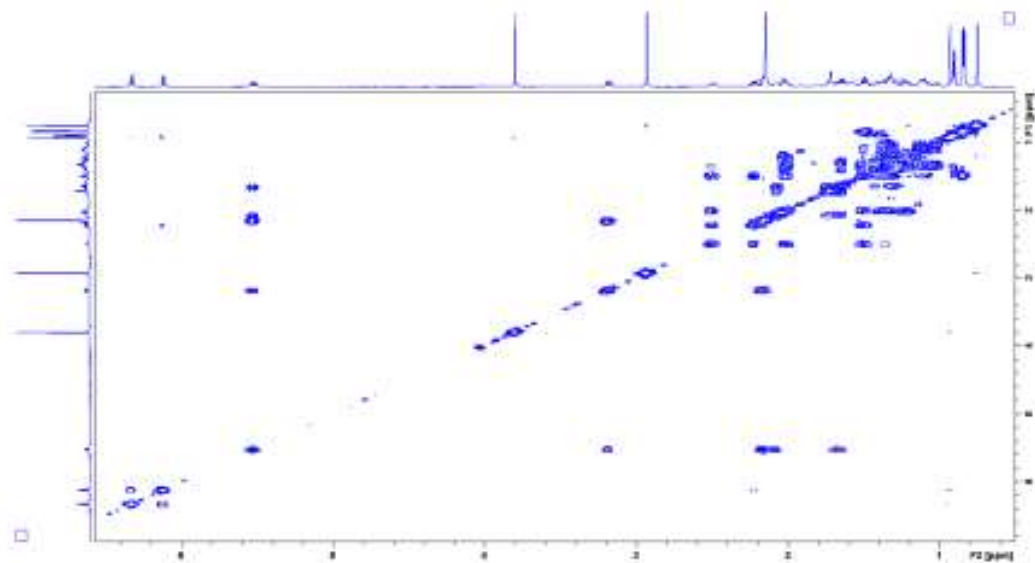

1H-1H COSY

1139

1140 **Figure-7B-3:** 1H-1H NMR spectral profile of MeTC7

1141

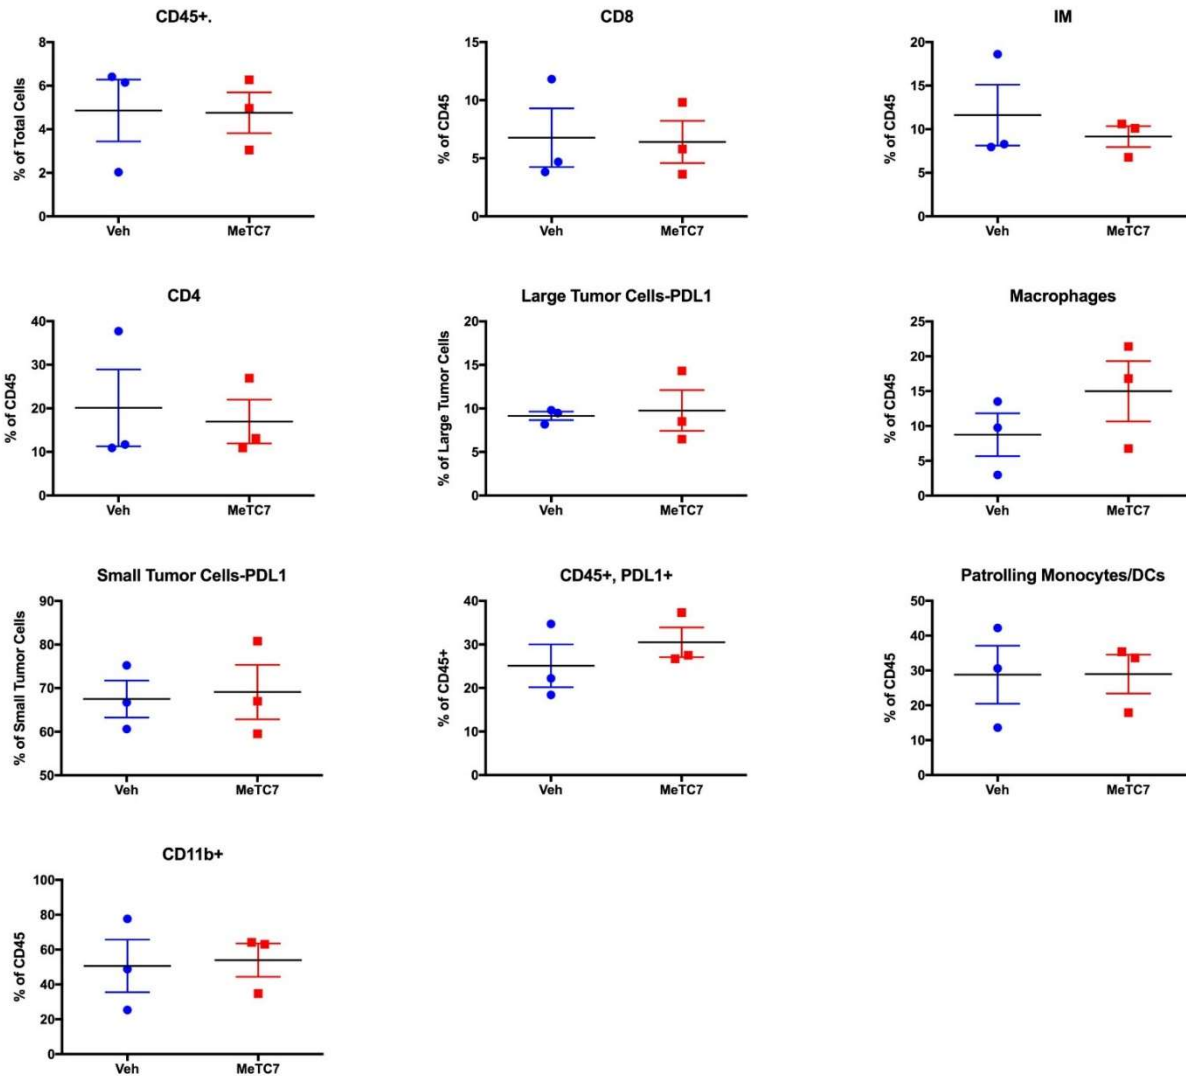

1142

1143 **Supplementary Information-8:** Spontaneous THMYCN tumor treated with vehicle or MeTC7  
1144 (10mg/kg, IP, once-daily) were harvested, broken into single cell suspension as described in  
1145 materials and method section. The cells were stained with mouse flowcytometric antibodies  
1146 representing CD45, PD-L1, CD11b, CD4 and CD8 antigens and those representing patrolling  
1147 monocytes/DCs, macrophages and inflammatory monocytes. Analysis of the data showed that  
1148 MeTC7 did not affect expression levels of immune markers analyzed.

1149

1150 **Supplementary Information-9:** List and catalog numbers of the antibodies or primers used for  
1151 the flow cytometric analyses and the CHIP assay.

- 1152 1. CD45-FITC, BD Bioscience, cat#553080
- 1153 2. CD8-PerCP-CyTM5.5, BD Bioscience, cat#551162
- 1154 3. CD69-APC, BD Bioscience, cat#560689
- 1155 4. PD1-PE-Cy7, Biolegend, cat#109110
- 1156 5. PDL1-BV605, Biolegend, cat#124321
- 1157 6. VDRE (f) primer sequence: 5' GGA AAGGCAAACAACGAAGA-3'; VDRE(r):  
1158 5'GCGCTGAACTTCTAGGTGCT-3'

1159

1160 **Abbreviations:**

1161 CDs: Cell differentiation markers (such as CD3, -8, -45 and -69)

1162 irAEs: Immune related adverse reactions

1163 MeTC7: Name of the drug candidate

1164 MTAD: N-methyl-1,2,4-triazoline dione

1165 PTAD: N-phenyl-1,2,4- triazoline dione

1166 RT: Radiation Therapy

1167 PD-L1: Programmed death receptor ligand

1168 PD-1: Programmed death receptor

1169 VDR: Vitamin-D receptor

1170

1171

1172

1173

1174

1175

1176

1177
